# Supplementary material
Source: publisher site journal article supplement (https://www.degruyterbrill.com/publication/isbn/9783110475340/downloadAsset/9783110475340_Beilage3_Excel.xlsx)
Supplement: Supplementary file 1 [file 9783110475340_Beilage3_Excel.xlsx]

## Sheet: Beilage 3 - Frauen
			TerraNigra	Tierkopfschnalle	Kamm1	Bügelfibel1	Glasbecher1	Drahtringe(Federenden)	Bügelfibel2	Bügelfibel3.2	Bronzebecken1	Kamm2.2	Halsring1	Fingerring1	S-Schließe	Nadel1	Keramikschale1	Fingerring2	Perlenstrang	Knochenröhre	Armreif2	Nadel2	PerlenkombinationA	Perle(dunkelblau)	Bügelfibel3.1	Kamm2.3	Nadel4	Perle(Chalcedon)	Keramikbecher2	Keramikbecher1	Kamm2.1	Gürtel4.1F	Gürtel3.1F	Glasschale1	Bügelfibel4.3	Armbrustfibel	Bügelknopffibel	Perle(Glas)	Gürtel4.3F	Vogelfibel1	Tierfibel1	Ohrring1.1	Gürtel4.5F	Vogelfibel3.1	Gehänge1	Silberlöffel	Gürtel4.4F	Knotenring	Bügelfibel4.1
	Phase 1	Wiesbaden-Schwalbacher Str.	●	●
		Hockenheim 2	●	●	●
		Heidelberg-Neuenheim	●	●	●
		Renningen 5			●	●
		Thüngersheim 1863			●		●
		Schleitheim-Hebsack 363		●	●			●					●
		Eschborn 44		●															●
	Phase 2	Pleidelsheim 49			●				●
		Eschborn 32					●		●
		Eschborn 29				●	●				●			●
		Eschborn 18						●	●			●				●			●
		Basel-Gotterbarmweg 18						●	●						●								●
		Eschborn 16				●	●			●								●	●				●	●										●
		Basel-Gotterbarmweg 13								●			●			●
		Schleitheim-Hebsack 455						●	●	●					●		●					●	●
		Nagold 2							●									●	●
		Pleidelsheim 93										●										●
		Basel-Kleinhüningen 100												●	●				●	●			●
		Heilbronn-Böckingen, Forchenweg 1							●		●		●																				●
		Hemmingen 51							●																																●
		Pleidelsheim 32												●							●		●
		Eschborn 40									●						●						●			●			●
		Basel-Gotterbarmweg 10							●													●																●
		Aldingen 18							●										●					●																								●
		Walheim							●							●			●					●
		Basel-Gotterbarmweg 20														●		●																													●
		Basel-Gotterbarmweg 6											●		●		●								●			●			●														●
		Flaach 18													●														●																				●
		Nagold 1							●																					●			●											●
		Pleidelsheim 47																		●						●																						●
		Basel-Kleinhüningen 101											●															●			●	●										●						●	●
		Basel-Kleinhüningen 126											●			●			●																					●		●	●		●			●	●
		Weingarten 242																	●																						●
		Pleidelsheim 6																					●	●
		Basel-Kleinhüningen 75																				●																											●
	Phase 3	Neresheim 49																			●												●
		Hugstetten 2																																●	●
		Herten 56																	●								●														●	●		●				●
		Mahlberg											●						●								●						●								●					●
		Weingarten 113																						●												●		●									●
		Pleidelsheim 114																					●														●
		Hemmingen 11																●
		Eltheim 2																	●																									●
		Pleidelsheim 2																																	●			●					●
		Pleidelsheim 1/1967												●																								●	●					●
		Altenerding 117																																	●						●
		Weingarten 414																	●																	●		●					●
		Herten 17																												●											●	●						●
		Heidenheim-Großkuchen, Gassenäcker 22																	●					●															●
		Fridingen/Donau 152																										●							●
		Eltville 147																											●		●							●						●
		Pleidelsheim 94																					●
		Altenerding 1299																					●														●										●
		Hemmingen 35																					●
		Basel-Gotterbarmweg 22																																				●				●							●
		Weingarten 111																												●											●
		Herrenberg 6																															●								●
		Basel-Gotterbarmweg 33																							●													●										●
		Altenerding 485																														●								●
		Unterhaching 10																															●									●							●
		Kochertürn																	●												●
		Hemmingen 59																																						●								●	●
		Fellbach-Schmiden 24																																					●		●							●
		Pleidelsheim 115																					●																									●
		Hemmingen 52																																				●									●
		Tiengen 1/1911																																							●
		Straubing-Bajuwarenstr. 266																					●
		Hemmingen 14																					●																					●
		Leonberg-Eltingen																															●
		Basel-Kleinhüningen 120																																●						●
		Aldingen 15																				●
		Unterhaching 9																					●																							●
		Horb-Altheim 65																																							●	●
		Lauchheim 1010																																							●							●	●
		Mengen 11																																							●
		Barbing-Irlmauth 31																											●
		Lörrach, Turmringerstr.																																								●
		Weingarten 711																																													●
		Stuttgart-Münster																																							●				●
		Kirchheim/Neckar 1964																								●			●					●												●
		Sindelfingen 1894																																								●
		Pleidelsheim 81																					●																					●			●
		Hemmingen 20																																				●										●
		Graben-Neudorf																													●														●
		Eltville 144																																●							●
		Barbing-Irlmauth 19																	●															●												●
		Schretzheim 472
		Altenerding 146																										●																●
		Massenheim																																							●
		Altenerding 289																															●
		Hemmingen 36																																														●	●
		Bittenbrunn 51
		Neresheim 148																																				●
		Altenerding 646																																													●
		Weingarten 775
		Tiengen 6
		Basel-Kleinhüningen 134
		Bischofsheim 8
		Altenerding 31																																													●
		Lauchheim 974
		Bolheim-Anhausen 2/1911
		Altenerding 88
		Altenerding 625																																														●
		Straubing-Wittelsbacherhöhe 2																																									●
		Flaach 21
		Basel-Kleinhüningen 35
		Basel-Gotterbarmweg 12
		Pleidelsheim 61
		Altenerding 91
		Mengen 12																																											●
		Altenerding 618
	Phase 4	Altenerding 607																																													●
		Weingarten 215																																										●
		Straubing-Bajuwarenstr. 150
		Deißlingen 16																				●																										●
		Altenerding 897
		Niedermörlen 7/1949
		Basel-Kleinhüningen 115
		Altenerding 319
		Westheim 60
		Rheinsheim 126
		Klepsau 10																																															●
		Hailfingen 262
		Weingarten 676
		Altenerding 256
		Altenerding 1237
		Hellmitzheim 2																																															●
		Heidelberg-Kirchheim, Heuau 47
		Marktoberdorf 114
		Barbing-Irlmauth 38
		Altenerding 343
		Pleidelsheim 110
		Basel-Bernerring 42																																															●
		Straubing-Bajuwarenstr. 432
		Gelchsheim 1
		Schretzheim 146
		Schretzheim 33
		Weingarten 507
		Schretzheim 426
		Schretzheim 145
		Unterthürheim 201
		Schretzheim 448
		Hailfingen 361
		Altenerding 1332
		Schretzheim 197
		Pleidelsheim 9
		Pleidelsheim 126
		Inzing 85
		Pleidelsheim 89
		Weihmörting 33
		Lauchheim 787
		Schretzheim 70
		Schretzheim 36
		Schwenningen a.N.
		Pleidelsheim 141
		Heidelberg-Kirchheim, Heuau 56
		Eschborn 24
		Altenerding 934
		Altenerding 447
		Neudingen 168																						●
		Würzburg 2
		Fellbach-Schmiden 13
		Weingarten 668
		Altenerding 870
		Pleidelsheim 139
		Lauchheim 1007
		Schretzheim 40
		Pleidelsheim 63
		Basel-Kleinhüningen 125
		Niedernberg 24
		Müdesheim 44
		Pleidelsheim 5
		Fellbach-Schmiden 39
		Schretzheim 502
		Pleidelsheim 4
		Basel-Bernerring 16
		Unterthürheim 51/52
		Unterthürheim 39
	Phase 5	Thalmässing 17
		Merdingen 140
		Klepsau 15
		Burghagel 1
		Pleidelsheim 140
		Klepsau 1
		Seinsheim 2
		Schretzheim 247
		Klepsau 7
		Klepsau 23
		Hailfingen 417b
		Hailfingen 405
		Weingarten 567
		Unterthürheim 6/1889
		Sontheim/Brenz 91
		Schretzheim 586
		Hailfingen 338
		Straubing-Bajuwarenstr. 803
		Sontheim/Brenz 178
		Pleidelsheim 128
		Niedernberg 11
		Heilbronn-Neckargartach
		Sontheim/Brenz 62
		Kelheim 41
		Straubing-Bajuwarenstr. 450
		Straubing-Bajuwarenstr. 257
		Schretzheim 300
		Peigen 97
		Esslingen-Sirnau 70
		Weilbach 17
		Sontheim/Brenz 174
		Schretzheim 250
		Schretzheim 206
		Klepsau 36
		Güttingen 38																																														●
		Dischingen
		Wenigumstadt 31
		Marktoberdorf 106
		Klepsau 33
		Kelheim 44
		Hüfingen 299
		Hailfingen 435
		Unterthürheim 76
		Klengen 9
		Klengen 3
		Kleinlangheim 226
		Schretzheim 513
		Merdingen 145
		Merdingen 139
		Binningen 12
		Bülach 4
		Sontheim/Brenz 141
		Heidenheim-Großkuchen, Pfaffensteig 1a
		Basel-Bernerring 27
		Schretzheim 529
		Schretzheim 182
		Hüfingen 53
		Schretzheim 26
		Klepsau 25
		Klepsau 4
		Herbolzheim 17
		Altenerding 1276
		Straubing-Bajuwarenstr. 465
		Sindelsdorf 107
		Schretzheim 583a
		Schretzheim 258
		Kelheim 32
		Herbrechtingen
		Niedernberg 8
		Hüfingen 268
		Altenerding 773
		Müdesheim 46
		Hailfingen 218
		Eichstetten 175
		Munningen
		Pleidelsheim 250
		Klepsau 50																																														●
		Schretzheim 22
		Klepsau 12
		Pleidelsheim 17
		Kleinlangheim 175
		Donzdorf 78
		Aschheim-Bajuwarenring 166
		Schretzheim 23
		Pleidelsheim 149
		Pleidelsheim 220
		Pleidelsheim 20
		Pleidelsheim 211
		Niedernberg 1/1961
		Eichstetten 99
		Schretzheim 126
		Niedernberg 40
		Eltville 184b
		Marktoberdorf 59
		Binningen 7
		Klepsau 29
		Weingarten 615
		Krautheim 4
		Kirchheim/Teck 85
		Heilbronn 2
		Pflaumheim 1/1960
		Schretzheim 233
		Hundsbach 1925
	Phase 6	Mainz-Hechtsheim 60
		Eppstein 288
		Lauchheim 66
		Schretzheim 133
		Schretzheim 251
		Lauchheim 90
		Mengen 811
		Eichstetten 85
		Pleidelsheim 196
		Lauchheim 9
		Weingarten 141
		Schretzheim 282
		Pleidelsheim 226
		Güttingen 7
		Schretzheim 320
		Schretzheim 226b
		Schretzheim 393
		Schretzheim 305
		Mannheim-Vogelstang 312
		Lauchheim 200
		Weingarten 178
		Kirchheim/Ries 326
		Schretzheim 53
		Eichstetten 270
		Marktoberdorf 16
		Schretzheim 336
		Schretzheim 54
		Schretzheim 399
		Pleidelsheim 155
		Bargen 11
		Weingarten 413
		Weingarten 481
		Weingarten 161
		Schretzheim 615
		Eichstetten 81
		Eichstetten 1
		Bargen 43
		Kirchheim/Ries 438
		Eichstetten 131
		Aschheim-Bajuwarenring 273
		Weingarten 317
		Schretzheim 541
		Kirchheim/Ries 117
		Fridingen/Donau 26
		Marktoberdorf 216
		Marktoberdorf 215
		Lauchheim 204
		Güttingen 49
		Bargen 30
	Phase 7	Weingarten 153
		Altenerding 878
		Altenerding 720
		Pleidelsheim 200
		Berghausen 88
		Eichstetten 133
		Eichstetten 132
		Bargen 18
		Bargen 14
		Schretzheim 628
		Pleidelsheim 165
		Donaueschingen 53/82a
		Bargen 5
		Pleidelsheim 108
		Weingarten 66
		Kirchheim/Ries 131
		Etting-Sandfeld 23
		Buchheim 4/1932
		Walda Grab A/Grab 7
		Großmehring-Straßgwender 87
		Kirchheim/Ries 34
		Pfakofen 209
			TerraNigra	Tierkopfschnalle	Kamm1	Bügelfibel1	Glasbecher1	Drahtringe(Federenden)	Bügelfibel2	Bügelfibel3.2	Bronzebecken1	Kamm2.2	Halsring1	Fingerring1	S-Schließe	Nadel1	Keramikschale1	Fingerring2	Perlenstrang	Knochenröhre	Armreif2	Nadel2	PerlenkombinationA	Perle(dunkelblau)	Bügelfibel3.1	Kamm2.3	Nadel4	Perle(Chalcedon)	Keramikbecher2	Keramikbecher1	Kamm2.1	Gürtel4.1F	Gürtel3.1F	Glasschale1	Bügelfibel4.3	Armbrustfibel	Bügelknopffibel	Perle(Glas)	Gürtel4.3F	Vogelfibel1	Tierfibel1	Ohrring1.1	Gürtel4.5F	Vogelfibel3.1	Gehänge1	Silberlöffel	Gürtel4.4F	Knotenring	Bügelfibel4.1
[truncated: 124 more columns]

## Sheet: CAPCA Seriation output (Frauen)
Matrix of seriated data
	Ohrring6	Kamm5	Gürtel3.3F	Scheibenfibel(Pressblech)	Ohrring7	Riemenzunge6	Scheibenfibel(Filigran2)	Schnalle1.4	Nadel10	Ohrring5	Ohrring1.2	PerlenkombinationE	Schnalle1.5	Nadel11	Keramiktopf4	Gürtel1.11a	RZ-Beschlag	Riemenzunge4	Riemenzunge5	Schnalle1.3	Ohrring4	Bronzering(Zierscheibe)	Gehänge4	Nadel9	PerlenkombinationD	Riemenzunge3	Nadel8	Zierscheibe2	Scheibenfibel(Filigran1)	Beinring(Zierscheibe)	PerlenkombinationC	Holzkasten1	Bügelfibel10.2	Schnalle1.2	Bügelfibel9.2	Scheibenfibel(Eisen-/Cloisonné)	Kugel2	Scheibenfibel(Glas)	Kamm4	Zierscheibe1	Perle(Amethyst)	Bügelfibel7	Scheibenfibel(Bronzezellen)	Nadel6	ScheibenfibelF	Bügelfibel8.2	Filigranschmuck	Kamm3	Nadel7
Pfakofen 209	1	1
Kirchheim/Ries 34	1			1
Großmehring-Straßgwender 87	1	1	1	1
Walda Grab A/Grab 7	1						1
Buchheim 4/1932		1			1
Etting-Sandfeld 23		1			1
Kirchheim/Ries 131			1		1
Weingarten 66				1	1
Pleidelsheim 108			1									1
Bargen 5				1								1
Donaueschingen 53/82a					1			1
Pleidelsheim 165			1								1	1
Schretzheim 628					1							1
Bargen 14				1							1	1
Bargen 18				1							1	1
Eichstetten 132					1			1				1
Eichstetten 133					1	1						1	1
Berghausen 88					1											1
Pleidelsheim 200					1							1			1
Altenerding 720						1					1
Altenerding 878						1							1
Weingarten 153					1															1
Bargen 30											1	1
Güttingen 49					1			1						1			1									1
Lauchheim 204							1		1		1			1			1									1
Marktoberdorf 215									1	1							1		1
Marktoberdorf 216									1	1							1	1
Fridingen/Donau 26						1					1		1				1											1
Kirchheim/Ries 117					1				1													1						1
Schretzheim 541												1								1
Weingarten 317										1										1
Aschheim-Bajuwarenring 273													1					1
Eichstetten 131								1																	1
Kirchheim/Ries 438											1						1		1	1
Bargen 43		1									1				1	1									1	1													1
Eichstetten 1										1															1
Eichstetten 81				1																											1
Schretzheim 615												1					1									1
Weingarten 161											1						1									1
Weingarten 481																	1		1
Weingarten 413																	1	1					1
Bargen 11											1														1	1
Pleidelsheim 155												1															1
Schretzheim 399								1										1							1		1
Schretzheim 54																			1	1				1
Schretzheim 336																				1					1
Marktoberdorf 16													1									1						1
Eichstetten 270								1				1																																					1
Schretzheim 53																			1		1						1
Kirchheim/Ries 326							1							1			1			1	1		1			1		1		1																		1
Weingarten 178																		1						1				1
Lauchheim 200											1				1	1											1		1
Mannheim-Vogelstang 312											1															1		1		1
Schretzheim 305												1														1		1		1
Schretzheim 393												1								1
Schretzheim 226b												1					1		1				1					1		1																1
Schretzheim 320																				1				1				1		1
Güttingen 7																	1	1									1	1	1				1
Pleidelsheim 226																1															1
Schretzheim 282																											1	1
Weingarten 141													1																											1
Lauchheim 9																	1									1		1																				1
Pleidelsheim 196												1																																				1
Eichstetten 85																				1											1
Mengen 811											1											1												1						1
Lauchheim 90																	1	1				1	1	1				1	1								1
Schretzheim 251																									1		1
Schretzheim 133																									1		1	1		1
Lauchheim 66																			1	1								1							1		1				1	1
Eppstein 288												1														1		1		1		1		1														1
Mainz-Hechtsheim 60												1														1				1																		1
Hundsbach 1925																												1		1								1
Schretzheim 233																									1			1		1
Pflaumheim 1/1960																										1			1						1
Heilbronn 2																												1	1
Kirchheim/Teck 85																													1				1
Krautheim 4																												1								1								1
Weingarten 615																											1	1	1								1		1					1
Klepsau 29																										1																	1					1
Binningen 7																												1		1																		1
Marktoberdorf 59																											1				1										1				1		1
Eltville 184b																									1																				1		1
Niedernberg 40																															1	1								1				1
Schretzheim 126																												1		1									1		1			1			1
Eichstetten 99																															1																	1
Niedernberg 1/1961																													1															1
Pleidelsheim 211																															1
Pleidelsheim 20																															1											1
Pleidelsheim 220																															1
Pleidelsheim 149																															1																	1
Schretzheim 23																																						1							1
Aschheim-Bajuwarenring 166																																	1												1		1
Donzdorf 78																														1			1												1		1
Kleinlangheim 175																																	1							1
Pleidelsheim 17																															1
Klepsau 12																															1	1								1				1
Schretzheim 22																														1										1				1
Klepsau 50																										1								1							1							1
Pleidelsheim 250																															1
Munningen																																	1
Eichstetten 175																													1
Hailfingen 218																																									1						1		1
Müdesheim 46																															1			1														1
Altenerding 773																													1
Hüfingen 268																																			1												1
Niedernberg 8																														1													1
Herbrechtingen																																			1		1			1	1			1
Kelheim 32																																						1
Schretzheim 258																														1										1								1
Schretzheim 583a																														1																		1
Sindelsdorf 107																																							1								1
Straubing-Bajuwarenstr. 465																																					1										1
Altenerding 1276																																					1		1
Herbolzheim 17																																											1					1
Klepsau 4																																			1	1								1			1	1
Klepsau 25																															1												1
Schretzheim 26																																								1					1	1
Hüfingen 53																																			1												1
Schretzheim 182																																										1
Schretzheim 529																																						1
Basel-Bernerring 27																																												1			1	1
Heidenheim-Großkuchen, Pfaffensteig 1a																														1														1				1
Sontheim/Brenz 141																																								1
Bülach 4																																									1						1
Binningen 12																																																1
Merdingen 139																																													1
Merdingen 145																																																1
Schretzheim 513																																									1
Kleinlangheim 226																																																1	1
Klengen 3																																		1														1
Klengen 9																																																1
Unterthürheim 76
Hailfingen 435
Hüfingen 299																																															1
Kelheim 44																																																1
Klepsau 33																																							1					1	1	1
Marktoberdorf 106																																																1
Wenigumstadt 31																																													1			1
Dischingen																																		1												1
Güttingen 38																												1													1
Klepsau 36																																								1				1		1
Schretzheim 206
Schretzheim 250
Sontheim/Brenz 174																														1										1						1
Weilbach 17
Esslingen-Sirnau 70																																																1
Peigen 97																																																1
Schretzheim 300																																															1
Straubing-Bajuwarenstr. 257																																																1
Straubing-Bajuwarenstr. 450
Kelheim 41
Sontheim/Brenz 62																																																1
Heilbronn-Neckargartach
Niedernberg 11
Pleidelsheim 128																																					1
Sontheim/Brenz 178
Straubing-Bajuwarenstr. 803																														1							1											1
Hailfingen 338																																																1
Schretzheim 586																																																1
Sontheim/Brenz 91
Unterthürheim 6/1889
Weingarten 567																																										1
Hailfingen 405
Hailfingen 417b
Klepsau 23																																																1
Klepsau 7																																		1													1
Schretzheim 247																																																1
Seinsheim 2
Klepsau 1
Pleidelsheim 140																																										1						1
Burghagel 1
Klepsau 15																																																1
Merdingen 140
Thalmässing 17
Unterthürheim 39																																								1
Unterthürheim 51/52																																																1
Basel-Bernerring 16
Pleidelsheim 4																																																1
Schretzheim 502																																								1								1
Fellbach-Schmiden 39
Pleidelsheim 5
Müdesheim 44																																																1
Niedernberg 24
Basel-Kleinhüningen 125
Pleidelsheim 63
Schretzheim 40
Lauchheim 1007																																															1	1
Pleidelsheim 139
Altenerding 870
Weingarten 668
Fellbach-Schmiden 13																																																1
Würzburg 2
Neudingen 168																																																1
Altenerding 447																																														1
Altenerding 934
Eschborn 24																																																1
Heidelberg-Kirchheim, Heuau 56																																																	1
Pleidelsheim 141																																																	1
Schwenningen a.N.																																					1
Schretzheim 36
Schretzheim 70
Lauchheim 787																																														1
Weihmörting 33																																																1
Pleidelsheim 89
Inzing 85
Pleidelsheim 126																																																	1
Pleidelsheim 9
Schretzheim 197
Altenerding 1332
Hailfingen 361
Schretzheim 448
Unterthürheim 201
Schretzheim 145
Schretzheim 426																																																1
Weingarten 507
Schretzheim 33																																							1
Schretzheim 146
Gelchsheim 1
Straubing-Bajuwarenstr. 432
Basel-Bernerring 42																																												1
Pleidelsheim 110
Altenerding 343																																							1
Barbing-Irlmauth 38																																							1
Marktoberdorf 114																																																1
Heidelberg-Kirchheim, Heuau 47
Hellmitzheim 2
Altenerding 1237
Altenerding 256
Weingarten 676
Hailfingen 262
Klepsau 10
Rheinsheim 126
Westheim 60
Altenerding 319
Basel-Kleinhüningen 115
Niedermörlen 7/1949																																																	1
Altenerding 897
Deißlingen 16
Straubing-Bajuwarenstr. 150
Weingarten 215
Altenerding 607
Altenerding 618
Mengen 12
Altenerding 91
Pleidelsheim 61
Basel-Gotterbarmweg 12
Basel-Kleinhüningen 35
Flaach 21
Straubing-Wittelsbacherhöhe 2
Altenerding 625
Altenerding 88
Bolheim-Anhausen 2/1911
Lauchheim 974
Altenerding 31
Bischofsheim 8
Basel-Kleinhüningen 134
Tiengen 6
Weingarten 775
Altenerding 646
Neresheim 148
Bittenbrunn 51
Hemmingen 36
Altenerding 289
Massenheim
Altenerding 146
Schretzheim 472
Barbing-Irlmauth 19
Eltville 144
Graben-Neudorf
Hemmingen 20
Pleidelsheim 81
Sindelfingen 1894
Kirchheim/Neckar 1964
Stuttgart-Münster
Weingarten 711
Lörrach, Turmringerstr.
Barbing-Irlmauth 31
Mengen 11
Lauchheim 1010
Horb-Altheim 65
Unterhaching 9
Aldingen 15
Basel-Kleinhüningen 120
Leonberg-Eltingen
Hemmingen 14
Straubing-Bajuwarenstr. 266
Tiengen 1/1911
Hemmingen 52
Pleidelsheim 115
Fellbach-Schmiden 24
Hemmingen 59
Kochertürn
Unterhaching 10
Altenerding 485
Basel-Gotterbarmweg 33
Herrenberg 6
Weingarten 111
Basel-Gotterbarmweg 22
Hemmingen 35
Altenerding 1299
Pleidelsheim 94
Eltville 147
Fridingen/Donau 152
Heidenheim-Großkuchen, Gassenäcker 22
Herten 17
Weingarten 414
Altenerding 117
Pleidelsheim 1/1967
Pleidelsheim 2
Eltheim 2
Hemmingen 11
Pleidelsheim 114
Weingarten 113
Mahlberg
Herten 56
Hugstetten 2
Neresheim 49
Basel-Kleinhüningen 75
Pleidelsheim 6
Weingarten 242
Basel-Kleinhüningen 126
Basel-Kleinhüningen 101
Pleidelsheim 47
Nagold 1
Flaach 18
Basel-Gotterbarmweg 6
Basel-Gotterbarmweg 20
Walheim
Aldingen 18
Basel-Gotterbarmweg 10
Eschborn 40
Pleidelsheim 32
Hemmingen 51
Heilbronn-Böckingen, Forchenweg 1
Basel-Kleinhüningen 100
Pleidelsheim 93
Nagold 2
Schleitheim-Hebsack 455
Basel-Gotterbarmweg 13
Eschborn 16
Basel-Gotterbarmweg 18
Eschborn 18
Eschborn 29
Eschborn 32
Pleidelsheim 49
Eschborn 44
Schleitheim-Hebsack 363
Thüngersheim 1863
Renningen 5
Heidelberg-Neuenheim
Hockenheim 2
Wiesbaden-Schwalbacher Str.
	-2.39517	-2.2231	-2.18008	-2.09405	-2.00801	-1.84669	-1.84669	-1.73915	-1.71764	-1.68538	-1.67462	-1.67462	-1.66387	-1.65311	-1.64236	-1.54557	-1.54557	-1.48104	-1.48104	-1.48104	-1.44878	-1.38425	-1.3735	-1.34123	-1.34123	-1.31972	-1.21218	-1.12614	-0.846525	-0.814261	-0.685207	-0.663698	-0.652944	-0.566908	-0.556153	-0.556153	-0.534644	-0.52389	-0.502381	-0.502381	-0.491626	-0.459363	-0.448608	-0.427099	-0.427099	-0.40559	-0.384081	-0.384081	-0.373327
The trendline used as basis for seriation of objects is: 0,6236X^2 -0,2126X + -0,6317
With a Pearson R^2 of 0,9886 for goodness of fit.
The trendline used as basis for seriation of variables is: 0,6204X^2 + -0,2172X + -0,6402
With a Pearson R^2 of 0,9901 for goodness of fit.
[truncated: 122 more columns]

## Sheet: CAPCA Statistics (Frauen)
Analysis completed after 142 iterations
No objects were excluded
No variables were excluded
Total Inertia of data
	1. Principal axis	2. Principal axis	3. Principal axis
Eigen values	0.914739	0.856206	0.810282
Variable coordinates	2.1893	2.04921	1.9393
Cumulative explanation %	1. Principal axis	2. Principal axis	3. Principal axis
Anhänger1	0.808249	-0.254064	-0.630417
Anhänger2	0.661077	-0.183443	-0.399923
Anhänger3	0.801886	-0.457361	-0.766167
Anhänger4	-0.389552	-0.592171	0.915385
Anhänger5	-0.304437	-0.557825	0.798256
Armbrustfibel	1.21453	-0.0641645	-1.15226
Armreif1	0.740325	-0.325044	-0.582872
Armreif2	1.48395	0.188205	-1.48226
Beinring(Zierscheibe)	-0.754745	0.00286556	0.441667
Bronzebecken1	1.82785	1.01261	-0.844704
Bronzebecken2	0.715726	-0.434843	-0.66272
Bronzehülse	0.748015	-0.329325	-0.640563
Bronzering(Zierscheibe)	-1.3366	0.885232	-0.228962
Bügelfibel(Rositz)	-0.0537471	-0.692222	0.61077
Bügelfibel(Vogelkopf)	0.458051	-0.494174	-0.194879
Bügelfibel1	2.40824	2.66775	0.772222
Bügelfibel10.1	0.0797581	-0.585984	0.360174
Bügelfibel10.2	-0.678524	-0.260186	0.802382
Bügelfibel2	1.79722	1.04738	-0.66446
Bügelfibel3.1	1.35977	0.0765	-1.33476
Bügelfibel3.2	1.84722	1.00543	-0.907942
Bügelfibel4.1	0.97362	-0.219315	-0.907959
Bügelfibel4.2	0.830803	-0.350574	-0.7749
Bügelfibel4.3	1.33624	-0.173255	-1.67583
Bügelfibel5.2	0.312864	-0.528728	-0.052783
Bügelfibel6.1	0.944385	-0.340881	-0.942427
Bügelfibel6.2	0.715525	-0.395464	-0.587416
Bügelfibel6.3	0.410102	-0.486928	-0.198431
Bügelfibel7	-0.492379	-0.442828	0.815661
Bügelfibel8.1	-0.27584	-0.660299	0.88617
Bügelfibel8.2	-0.364997	-0.388341	0.562782
Bügelfibel9.1	-0.185222	-0.54107	0.611178
Bügelfibel9.2	-0.580925	-0.354193	0.812843
Bügelknopffibel	1.21221	-0.109507	-1.2223
Drahtringe(Federenden)	2.15138	1.90555	0.0334834
Filigranschmuck	-0.419726	-0.512797	0.849105
Fingerring1	1.70323	0.734758	-1.03951
Fingerring2	1.58421	0.559943	-0.982306
Flachsbreche	-0.17084	-0.451299	0.410556
Gehänge1	1.06523	-0.136499	-0.983323
Gehänge2	-0.345038	-0.444263	0.65224
Gehänge3	-0.100568	-0.660598	0.638356
Gehänge4	-1.32901	0.839816	-0.13481
Geweihrosenring	0.369737	-0.455992	-0.189884
Geweihscheibe1	-0.162157	-0.615345	0.66965
Geweihscheibe2	-0.295739	-0.576652	0.754701
Glasbecher1	2.37056	2.49182	0.517148
Glasbecher2	0.972953	-0.341974	-0.995427
Glasschale1	1.18551	-0.0327733	-1.01
Gürtel1.11a	-1.47438	1.21707	-0.720514
Gürtel2.9	-0.28247	-0.762298	1.04357
Gürtel3.1F	1.25366	-0.068935	-1.22658
Gürtel3.3F	-2.22384	2.76385	-2.52677
Gürtel4.1F	1.29521	-0.112699	-1.41716
Gürtel4.3F	1.15945	-0.121454	-1.14196
Gürtel4.4F	1.04578	-0.239015	-1.01137
Gürtel4.5F	1.10753	-0.150289	-1.10542
Gürtel4.6F	-0.0633634	-0.614604	0.572121
Gürtel4.7F	-0.351102	-0.568381	0.841805
Gürtel4.8F	-0.0520153	-0.623365	0.516838
Halsring1	1.68445	0.912206	-0.565266
Hefteln2	-0.236137	-0.728261	0.930881
Holzkasten1	-0.668856	-0.224951	0.68872
Holzkasten2	-0.336581	-0.614058	0.882117
Kamm1	3.31281	5.68288	4.31015
Kamm2.1	1.21493	-0.0465244	-1.16374
Kamm2.2	1.82485	0.9246	-1.03552
Kamm2.3	1.31249	0.0724023	-1.25609
Kamm3	-0.37481	-0.451201	0.666879
Kamm4	-0.369867	-0.213617	0.277292
Kamm5	-2.25743	2.90376	-2.77982
Keramikbecher1	1.30429	-0.122248	-1.44406
Keramikbecher2	1.23157	-0.0340658	-1.17927
Keramikkrug2	-0.00746698	-0.645045	0.503277
Keramikschale1	1.67097	0.555359	-1.28111
Keramiktopf1	-0.19985	-0.624295	0.750826
Keramiktopf2	-0.369247	-0.57352	0.871279
Keramiktopf3	-0.339377	-0.641568	0.926081
Keramiktopf4	-1.568	1.41579	-0.931871
Knochenröhre	1.53663	0.317756	-1.4189
Knotenring	0.947859	-0.171434	-0.928823
Kugel1	0.712243	-0.332807	-0.599477
Kugel2	-0.502014	-0.304286	0.630377
Nadel1	1.60044	0.599778	-0.998377
Nadel10	-1.74581	1.53812	-0.733823
Nadel11	-1.63579	1.41884	-0.751614
Nadel2	1.31881	0.246978	-0.959177
Nadel3	0.852911	-0.466775	-0.894334
Nadel4	1.27143	-0.0313115	-1.20869
Nadel5	0.768251	-0.410887	-0.737549
Nadel6	-0.447721	-0.454119	0.792337
Nadel7	-0.242843	-0.285003	0.186548
Nadel8	-1.15585	0.556135	0.0765529
Nadel9	-1.32601	0.777323	-0.000875183
Ohrring1.1	1.19095	-0.18606	-1.29611
Ohrring1.2	-1.64412	1.48074	-0.891401
Ohrring2	0.87916	-0.342898	-0.822108
Ohrring3	0.971556	-0.278669	-0.900974
Ohrring4	-1.43037	0.972685	-0.214511
Ohrring5	-1.73394	1.45293	-0.548414
Ohrring6	-2.48121	3.40115	-3.43465
Ohrring7	-2.03118	2.28476	-1.84343
Perle(Amethyst)	-0.475769	-0.363977	0.695425
Perle(Knochen)	-0.106868	-0.576499	0.539082
Perle(Chalcedon)	1.26221	-0.0452351	-1.29003
Perle(dunkelblau)	1.1643	0.210128	-0.69825
Perle(Glas)	1.18582	-0.123505	-1.21329
Perle(Millefiori)	-0.345466	-0.511309	0.727754
Perle(Reticella)	-0.204601	-0.598471	0.699721
PerlenkombinationA	1.34636	0.188008	-1.07952
PerlenkombinationB	0.0895567	-0.588446	0.314611
PerlenkombinationC	-0.677599	-0.189691	0.616949
PerlenkombinationD	-1.27709	0.788867	-0.167248
PerlenkombinationE	-1.61188	1.49835	-1.01566
Perlenstrang	1.45958	0.511155	-0.739876
Rautenfibel	0.223232	-0.629482	0.0872392
Riemenzunge1	0.604848	-0.449283	-0.478817
Riemenzunge2	-0.286893	-0.574537	0.774936
Riemenzunge3	-1.22236	0.7686	-0.223315
Riemenzunge4	-1.47355	1.03304	-0.231595
Riemenzunge5	-1.47616	1.03779	-0.239023
Riemenzunge6	-1.88437	1.85811	-1.15204
RZ-Beschlag	-1.53081	1.1806	-0.439462
Scheibenfibel(Bronzezellen)	-0.475644	-0.461399	0.807617
Scheibenfibel(Eisen-/Cloisonné)	-0.603184	-0.380615	0.88499
Scheibenfibel(Filigran1)	-0.796714	0.03108	0.463339
Scheibenfibel(Filigran2)	-1.82898	1.87956	-1.38623
Scheibenfibel(Glas)	-0.580165	-0.43047	0.933897
Scheibenfibel(Kerbschnitt)	0.498079	-0.507434	-0.302948
Scheibenfibel(Pressblech)	-2.0973	2.5186	-2.28412
ScheibenfibelA/B	-0.14588	-0.677781	0.705729
ScheibenfibelC	-0.119567	-0.610337	0.595492
ScheibenfibelD/E	-0.303614	-0.599622	0.819327
ScheibenfibelF	-0.477621	-0.507517	0.91209
ScheibenfibelH	-0.381464	-0.4966	0.799885
Schlüssel	-0.201084	-0.481273	0.503904
Schnalle1.2	-0.502411	-0.239823	0.502589
Schnalle1.3	-1.45843	1.05063	-0.334952
Schnalle1.4	-1.70456	1.63109	-1.08049
Schnalle1.5	-1.66562	1.4354	-0.703652
Schnalle2.1	-0.385632	-0.503069	0.775089
S-Fibel1	0.333581	-0.428194	-0.0570977
S-Fibel2	-0.263075	-0.617849	0.798948
S-Fibel3	-0.290167	-0.556565	0.733034
S-Fibel4	-0.337369	-0.653446	0.936407
Silberlöffel	1.03212	-0.207622	-0.940015
S-Schließe	1.68206	0.6057	-1.2132
Sturzbecher1	-0.306777	-0.657113	0.899915
Sturzbecher2	-0.362344	-0.587716	0.883444
Sturzbecher3	-0.400324	-0.638484	1.01436
TerraNigra	4.02089	8.27329	7.59979
Tierfibel1	1.1862	-0.187506	-1.26361
Tierfibel2	0.919078	-0.480779	-1.0121
Tierkopfschnalle	3.54399	6.69272	5.77007
Vierpassfibel	-0.207675	-0.681174	0.791191
Vogelfibel1	1.19656	-0.180738	-1.28625
Vogelfibel2	0.37927	-0.45085	-0.0317145
Vogelfibel3.1	1.08531	-0.164975	-1.02446
Vogelfibel3.2	0.777419	-0.354612	-0.700334
Vogelfibel3.3	0.873399	-0.262591	-0.896247
Vogelfibel3.4	0.519583	-0.55671	-0.304071
Vogelfibel4	0.0390275	-0.629061	0.3361
Vogelfibel5	0.230288	-0.573743	0.00304498
Webschwert	-0.282224	-0.54238	0.704157
Wirtel(Bernstein)	0.712788	-0.310233	-0.530663
Wirtel(Glas)	0.0235123	-0.595348	0.41692
Wirtel(Knochen)	-0.313173	-0.483056	0.592621
Wirtel(Kristall)	0.335405	-0.473008	-0.108057
Wirtel(Millefiori)	-0.206102	-0.568298	0.693588
Zierscheibe1	-0.508061	-0.384215	0.739698
Zierscheibe2	-1.06166	0.438925	0.154861
Object coordinates
	1. Principal axis	2. Principal axis	3. Principal axis
Aldingen 15	0.96703	-0.170665	-0.788534
Aldingen 18	1.4034	0.431452	-0.841963
Altenerding 117	1.31869	-0.19511	-1.63271
Altenerding 1237	0.349647	-0.492117	-0.00969915
Altenerding 1276	-0.375116	-0.463737	0.696688
Altenerding 1299	1.14536	-0.139291	-1.11466
Altenerding 1332	0.0283282	-0.492507	0.293974
Altenerding 146	0.854197	-0.310577	-0.770602
Altenerding 256	0.388792	-0.562887	-0.109543
Altenerding 289	0.907777	-0.375873	-0.897526
Altenerding 31	0.783861	-0.445633	-0.736287
Altenerding 319	0.510677	-0.532675	-0.336489
Altenerding 343	0.198157	-0.393064	-0.0957232
Altenerding 447	-0.0528361	-0.476293	0.344863
Altenerding 485	1.19758	-0.228646	-1.35005
Altenerding 607	0.605088	-0.467372	-0.437645
Altenerding 618	0.565696	-0.409286	-0.439276
Altenerding 625	0.691768	-0.401395	-0.610001
Altenerding 646	0.846227	-0.37578	-0.811118
Altenerding 720	-1.84464	1.80405	-1.13526
Altenerding 773	-0.382238	-0.425533	0.640675
Altenerding 870	-0.155809	-0.652459	0.712115
Altenerding 878	-1.85588	1.77956	-1.03097
Altenerding 88	0.692962	-0.422358	-0.56798
Altenerding 897	0.528519	-0.484706	-0.322417
Altenerding 91	0.621052	-0.453463	-0.469635
Altenerding 934	-0.0887929	-0.564587	0.524155
Aschheim-Bajuwarenring 166	-0.502109	-0.465901	0.893182
Aschheim-Bajuwarenring 273	-1.64111	1.33378	-0.519648
Barbing-Irlmauth 19	0.866637	-0.265231	-0.691534
Barbing-Irlmauth 31	0.936627	-0.271916	-0.870022
Barbing-Irlmauth 38	0.217035	-0.428935	-0.0582341
Bargen 5	-1.9391	2.17039	-1.83315
Bargen 11	-1.44413	1.09443	-0.474848
Bargen 14	-1.86574	1.98031	-1.55225
Bargen 18	-1.86574	1.98031	-1.55225
Bargen 30	-1.70218	1.60966	-1.05948
Bargen 43	-1.46577	1.29077	-0.862997
Basel-Bernerring 16	-0.252986	-0.685239	0.886683
Basel-Bernerring 27	-0.388963	-0.580501	0.903798
Basel-Bernerring 42	0.195223	-0.50704	0.175773
Basel-Gotterbarmweg 10	1.49929	0.421679	-1.05058
Basel-Gotterbarmweg 12	0.664319	-0.47577	-0.566508
Basel-Gotterbarmweg 13	1.78865	0.906775	-0.915349
Basel-Gotterbarmweg 18	1.82373	1.01218	-0.812116
Basel-Gotterbarmweg 20	1.4744	0.33156	-1.10801
Basel-Gotterbarmweg 22	1.16768	-0.190654	-1.26545
Basel-Gotterbarmweg 33	1.11637	-0.154946	-1.16012
Basel-Gotterbarmweg 6	1.48465	0.296529	-1.2429
Basel-Kleinhüningen 100	1.616	0.509405	-1.22007
Basel-Kleinhüningen 101	1.27996	0.0200914	-1.20124
Basel-Kleinhüningen 115	0.51799	-0.570362	-0.372285
Basel-Kleinhüningen 120	1.07911	-0.273469	-1.11223
Basel-Kleinhüningen 125	-0.176317	-0.65369	0.70042
Basel-Kleinhüningen 126	1.21426	0.0391647	-1.01242
Basel-Kleinhüningen 134	0.852309	-0.443934	-0.88572
Basel-Kleinhüningen 35	0.639431	-0.453448	-0.509814
Basel-Kleinhüningen 75	1.19844	0.0148415	-1.03712
Berghausen 88	-1.83265	1.89209	-1.42439
Binningen 12	-0.35777	-0.583264	0.857209
Binningen 7	-0.613092	-0.25281	0.671157
Bischofsheim 8	0.746698	-0.381392	-0.621002
Bittenbrunn 51	0.866058	-0.364121	-0.856422
Bolheim-Anhausen 2/1911	0.730689	-0.43827	-0.653476
Buchheim 4/1932	-2.24201	2.80338	-2.56835
Bülach 4	-0.351437	-0.538773	0.803185
Burghagel 1	-0.25195	-0.663789	0.877569
Deißlingen 16	0.495177	-0.385024	-0.232759
Dischingen	-0.25986	-0.491962	0.601862
Donaueschingen 53/82a	-1.95299	2.11578	-1.62437
Donzdorf 78	-0.488623	-0.444915	0.835853
Eichstetten 1	-1.57412	1.21133	-0.397664
Eichstetten 131	-1.55876	1.30757	-0.693222
Eichstetten 132	-1.86377	1.95025	-1.45908
Eichstetten 133	-1.8802	1.91181	-1.30966
Eichstetten 175	-0.366862	-0.384919	0.557617
Eichstetten 270	-1.24049	1.0246	-0.707258
Eichstetten 81	-1.45067	1.25834	-0.926193
Eichstetten 85	-1.11668	0.465227	0.156583
Eichstetten 99	-0.550181	-0.346236	0.713154
Eltheim 2	1.13633	-0.0178435	-0.870866
Eltville 144	0.89475	-0.293206	-0.781609
Eltville 147	1.15553	-0.134806	-1.15782
Eltville 184b	-0.562976	-0.283724	0.641319
Eppstein 288	-0.832214	0.18124	0.225814
Eschborn 16	1.74688	1.02682	-0.573427
Eschborn 18	1.84719	1.07815	-0.756607
Eschborn 24	-0.0980716	-0.581426	0.461474
Eschborn 29	2.17213	1.86609	-0.165426
Eschborn 32	2.17884	1.91243	-0.082051
Eschborn 40	1.54519	0.387699	-1.25331
Eschborn 44	2.61578	3.89296	2.79361
Esslingen-Sirnau 70	-0.307753	-0.594054	0.809532
Etting-Sandfeld 23	-2.24201	2.80338	-2.56835
Fellbach-Schmiden 13	-0.123896	-0.593589	0.573967
Fellbach-Schmiden 24	1.10775	-0.222014	-1.18777
Fellbach-Schmiden 39	-0.19091	-0.581001	0.631139
Flaach 18	1.35479	0.126793	-1.22218
Flaach 21	0.674741	-0.476586	-0.593513
Fridingen/Donau 152	1.21002	-0.173452	-1.43014
Fridingen/Donau 26	-1.62828	1.38189	-0.673756
Graben-Neudorf	0.889385	-0.271008	-0.817872
Großmehring-Straßgwender 87	-2.36816	3.13033	-3.06243
Güttingen 38	-0.168851	-0.334078	0.338516
Güttingen 49	-1.69898	1.57426	-0.964088
Güttingen 7	-1.16705	0.536695	0.152888
Hailfingen 218	-0.396735	-0.418449	0.641078
Hailfingen 262	0.439617	-0.58708	-0.238816
Hailfingen 338	-0.273351	-0.619701	0.800691
Hailfingen 361	0.00808808	-0.578913	0.354361
Hailfingen 405	-0.255325	-0.598683	0.735025
Hailfingen 417b	-0.289722	-0.66478	0.912207
Hailfingen 435	-0.367704	-0.650662	0.990828
Heidelberg-Kirchheim, Heuau 47	0.295626	-0.534367	0.0390319
Heidelberg-Kirchheim, Heuau 56	-0.0774909	-0.544069	0.42665
Heidelberg-Neuenheim	3.7911	7.43922	6.54614
Heidenheim-Großkuchen, Gassenäcker 22	1.07117	-0.059098	-0.871569
Heidenheim-Großkuchen, Pfaffensteig 1a	-0.329741	-0.499197	0.69893
Heilbronn 2	-0.712239	-0.0255537	0.455249
Heilbronn-Böckingen, Forchenweg 1	1.52726	0.557176	-0.863
Heilbronn-Neckargartach	-0.285857	-0.625465	0.819079
Hellmitzheim 2	0.32544	-0.514873	0.0300857
Hemmingen 11	1.15222	-0.0489307	-0.972072
Hemmingen 14	1.02318	-0.210473	-0.96044
Hemmingen 20	0.893221	-0.282283	-0.898919
Hemmingen 35	1.07792	-0.112196	-0.925901
Hemmingen 36	0.829319	-0.31886	-0.752299
Hemmingen 51	1.55968	0.46453	-1.07102
Hemmingen 52	1.1069	-0.253513	-1.17276
Hemmingen 59	1.08671	-0.205991	-1.15645
Herbolzheim 17	-0.41884	-0.56525	0.909165
Herbrechtingen	-0.42452	-0.502812	0.837557
Herrenberg 6	1.17948	-0.21531	-1.27109
Herten 17	1.21006	-0.180418	-1.36991
Herten 56	1.24445	-0.0415748	-1.19637
Hockenheim 2	3.7911	7.43922	6.54614
Horb-Altheim 65	1.09117	-0.319268	-1.22099
Hüfingen 268	-0.44085	-0.519031	0.905484
Hüfingen 299	-0.316256	-0.56938	0.811194
Hüfingen 53	-0.377683	-0.547131	0.856711
Hugstetten 2	1.31833	-0.111484	-1.49186
Hundsbach 1925	-0.835258	0.00413632	0.566725
Inzing 85	-0.019189	-0.612328	0.450363
Kelheim 32	-0.408423	-0.492584	0.798697
Kelheim 41	-0.271631	-0.569266	0.717445
Kelheim 44	-0.312291	-0.54391	0.72897
Kirchheim/Neckar 1964	0.89736	-0.265355	-0.804246
Kirchheim/Ries 117	-1.61416	1.39054	-0.736524
Kirchheim/Ries 131	-2.22446	2.72779	-2.42779
Kirchheim/Ries 326	-1.32023	0.875493	-0.246892
Kirchheim/Ries 34	-2.39357	3.19844	-3.17692
Kirchheim/Ries 438	-1.59698	1.28322	-0.529181
Kirchheim/Teck 85	-0.771229	-0.123727	0.70307
Kleinlangheim 175	-0.505677	-0.468718	0.88896
Kleinlangheim 226	-0.29642	-0.512703	0.635252
Klengen 3	-0.311605	-0.539333	0.730494
Klengen 9	-0.331614	-0.556221	0.774634
Klepsau 1	-0.250146	-0.615087	0.720192
Klepsau 10	0.401246	-0.425604	-0.119024
Klepsau 12	-0.485124	-0.467254	0.846042
Klepsau 15	-0.246836	-0.635908	0.778507
Klepsau 23	-0.266338	-0.622414	0.785168
Klepsau 25	-0.379289	-0.519444	0.770617
Klepsau 29	-0.632118	-0.176994	0.54963
Klepsau 33	-0.291516	-0.50889	0.666285
Klepsau 36	-0.303657	-0.563995	0.766479
Klepsau 4	-0.417519	-0.561865	0.914934
Klepsau 50	-0.335028	-0.27946	0.415946
Klepsau 7	-0.18918	-0.465027	0.508001
Kochertürn	1.00039	-0.126033	-0.817841
Krautheim 4	-0.736276	-0.142515	0.678487
Lauchheim 1007	-0.117065	-0.522374	0.516621
Lauchheim 1010	0.999407	-0.273826	-1.04509
Lauchheim 200	-1.21706	0.766658	-0.250353
Lauchheim 204	-1.67428	1.48886	-0.819633
Lauchheim 66	-0.903271	0.16401	0.402322
Lauchheim 787	-0.0376498	-0.534434	0.370226
Lauchheim 9	-1.09514	0.523317	0.0440871
Lauchheim 90	-1.03962	0.421211	0.165684
Lauchheim 974	0.73543	-0.441596	-0.674633
Leonberg-Eltingen	1.0746	-0.284502	-1.10686
Lörrach, Turmringerstr.	1.00188	-0.36158	-1.09804
Mahlberg	1.18758	-0.0163619	-0.979634
Mainz-Hechtsheim 60	-0.77508	0.159288	0.161573
Mannheim-Vogelstang 312	-1.22407	0.72707	-0.144002
Marktoberdorf 106	-0.329056	-0.579588	0.815124
Marktoberdorf 114	0.260654	-0.385715	-0.127359
Marktoberdorf 16	-1.41635	0.994064	-0.288123
Marktoberdorf 215	-1.69558	1.40742	-0.544716
Marktoberdorf 216	-1.69489	1.40613	-0.542653
Marktoberdorf 59	-0.618981	-0.275356	0.718033
Massenheim	0.891425	-0.35643	-0.880761
Mengen 11	0.977844	-0.308267	-0.988157
Mengen 12	0.578117	-0.403964	-0.446884
Mengen 811	-1.04326	0.470636	0.0338064
Merdingen 139	-0.373536	-0.611644	0.935908
Merdingen 140	-0.242644	-0.635009	0.795214
Merdingen 145	-0.342719	-0.569221	0.812363
Müdesheim 44	-0.157956	-0.56719	0.614005
Müdesheim 46	-0.392457	-0.429488	0.651291
Munningen	-0.459036	-0.477973	0.859993
Nagold 1	1.33516	0.0756025	-1.17802
Nagold 2	1.6872	0.763068	-0.883878
Neresheim 148	0.800491	-0.326563	-0.729731
Neresheim 49	1.25851	-0.0517677	-1.33498
Niedermörlen 7/1949	0.435688	-0.372917	-0.407738
Niedernberg 1/1961	-0.559997	-0.36403	0.792172
Niedernberg 11	-0.301847	-0.640554	0.880351
Niedernberg 24	-0.198706	-0.662502	0.789503
Niedernberg 40	-0.601785	-0.338446	0.788154
Niedernberg 8	-0.389415	-0.446076	0.678904
Peigen 97	-0.295171	-0.564345	0.760302
Pfakofen 209	-2.47728	3.40654	-3.45228
Pflaumheim 1/1960	-0.769808	0.000379158	0.473559
Pleidelsheim 1/1967	1.14784	-0.0560243	-1.0244
Pleidelsheim 108	-2.00525	2.3029	-1.96794
Pleidelsheim 110	0.195995	-0.597499	0.194428
Pleidelsheim 114	1.17341	-0.0633569	-1.08582
Pleidelsheim 115	1.02007	-0.186148	-0.96747
Pleidelsheim 126	0.0198062	-0.493376	0.245682
Pleidelsheim 128	-0.270386	-0.593627	0.767249
Pleidelsheim 139	-0.182362	-0.676534	0.777838
Pleidelsheim 140	-0.241182	-0.596106	0.718598
Pleidelsheim 141	-0.0701733	-0.529109	0.342214
Pleidelsheim 149	-0.487189	-0.414989	0.74495
Pleidelsheim 155	-1.44693	1.1101	-0.521767
Pleidelsheim 165	-1.90985	2.06865	-1.64212
Pleidelsheim 17	-0.451067	-0.394801	0.68222
Pleidelsheim 196	-1.03861	0.565813	-0.193801
Pleidelsheim 2	1.26499	-0.161197	-1.47918
Pleidelsheim 20	-0.536453	-0.434372	0.853195
Pleidelsheim 200	-1.81617	1.87269	-1.40404
Pleidelsheim 211	-0.543664	-0.419991	0.833456
Pleidelsheim 220	-0.508844	-0.41402	0.761944
Pleidelsheim 226	-1.12502	0.555143	-0.0575914
Pleidelsheim 250	-0.47363	-0.457208	0.795004
Pleidelsheim 32	1.58004	0.400077	-1.33363
Pleidelsheim 4	-0.202487	-0.582185	0.64299
Pleidelsheim 47	1.32333	0.078655	-1.33452
Pleidelsheim 49	2.67143	3.63697	2.02461
Pleidelsheim 5	-0.18041	-0.567167	0.575658
Pleidelsheim 6	1.10542	0.0772578	-0.806422
Pleidelsheim 61	0.618992	-0.459897	-0.482259
Pleidelsheim 63	-0.184939	-0.671607	0.769949
Pleidelsheim 81	0.881723	-0.260915	-0.730029
Pleidelsheim 89	-0.0289831	-0.574396	0.4327
Pleidelsheim 9	-0.0169298	-0.624377	0.496366
Pleidelsheim 93	1.64345	0.632957	-1.10805
Pleidelsheim 94	1.0762	-0.0783397	-0.932604
Renningen 5	2.99086	4.51263	2.82252
Rheinsheim 126	0.431202	-0.514017	-0.192648
Schleitheim-Hebsack 363	2.79496	4.10521	2.6514
Schleitheim-Hebsack 455	1.76462	0.857435	-0.963731
Schretzheim 126	-0.548575	-0.290127	0.6513
Schretzheim 133	-0.960837	0.275714	0.27405
Schretzheim 145	0.0547197	-0.573311	0.304574
Schretzheim 146	0.0954079	-0.600893	0.31042
Schretzheim 182	-0.411551	-0.599572	0.960597
Schretzheim 197	-0.0294435	-0.684155	0.566837
Schretzheim 206	-0.325362	-0.613592	0.876602
Schretzheim 22	-0.468643	-0.442568	0.786474
Schretzheim 226b	-1.21424	0.711715	-0.106358
Schretzheim 23	-0.552991	-0.506741	1.02543
Schretzheim 233	-0.782622	0.0259227	0.439112
Schretzheim 247	-0.246025	-0.601539	0.734678
Schretzheim 250	-0.327347	-0.600607	0.844411
Schretzheim 251	-0.968337	0.300351	0.235871
Schretzheim 258	-0.409302	-0.501693	0.792732
Schretzheim 26	-0.393335	-0.549352	0.857336
Schretzheim 282	-1.15928	0.537699	0.128478
Schretzheim 300	-0.308594	-0.611445	0.847234
Schretzheim 305	-1.21564	0.731823	-0.178513
Schretzheim 320	-1.20262	0.613241	0.0723321
Schretzheim 33	0.10425	-0.401596	0.0415726
Schretzheim 336	-1.43008	0.993952	-0.279069
Schretzheim 36	-0.0858798	-0.656668	0.603505
Schretzheim 393	-1.19047	0.734019	-0.230735
Schretzheim 399	-1.46668	1.08314	-0.389721
Schretzheim 40	-0.154417	-0.584713	0.585958
Schretzheim 426	0.0644441	-0.517984	0.20221
Schretzheim 448	0.0337915	-0.539374	0.294081
Schretzheim 472	0.974188	-0.444102	-1.08561
Schretzheim 502	-0.186983	-0.556064	0.588631
Schretzheim 513	-0.347913	-0.556104	0.82668
Schretzheim 529	-0.422851	-0.598098	0.972125
Schretzheim 53	-1.41583	0.924574	-0.139707
Schretzheim 54	-1.48491	1.03232	-0.212992
Schretzheim 541	-1.60511	1.37728	-0.750372
Schretzheim 583a	-0.378203	-0.453339	0.675081
Schretzheim 586	-0.268436	-0.620188	0.795691
Schretzheim 615	-1.52132	1.24187	-0.621682
Schretzheim 628	-1.90453	2.04406	-1.58835
Schretzheim 70	-0.0769032	-0.625676	0.561556
Schwenningen a.N.	-0.0549771	-0.482331	0.393824
Seinsheim 2	-0.268604	-0.628351	0.813396
Sindelfingen 1894	0.92015	-0.315978	-0.933869
Sindelsdorf 107	-0.388357	-0.46978	0.727829
Sontheim/Brenz 141	-0.37914	-0.569771	0.86114
Sontheim/Brenz 174	-0.23963	-0.461497	0.552704
Sontheim/Brenz 178	-0.313704	-0.680131	0.961955
Sontheim/Brenz 62	-0.304512	-0.611802	0.80997
Sontheim/Brenz 91	-0.283397	-0.622272	0.824531
Straubing-Bajuwarenstr. 150	0.610411	-0.524392	-0.47496
Straubing-Bajuwarenstr. 257	-0.298709	-0.582637	0.7818
Straubing-Bajuwarenstr. 266	1.02626	-0.21512	-0.959732
Straubing-Bajuwarenstr. 432	0.167979	-0.482185	0.165667
Straubing-Bajuwarenstr. 450	-0.30135	-0.592264	0.811851
Straubing-Bajuwarenstr. 465	-0.410486	-0.502708	0.819653
Straubing-Bajuwarenstr. 803	-0.209013	-0.460444	0.544399
Straubing-Wittelsbacherhöhe 2	0.639737	-0.374098	-0.545835
Stuttgart-Münster	0.927602	-0.292223	-0.905497
Thalmässing 17	-0.287334	-0.725493	0.992394
Thüngersheim 1863	2.97116	4.41755	2.68085
Tiengen 1/1911	1.11384	-0.285645	-1.22533
Tiengen 6	0.837919	-0.422386	-0.831496
Unterhaching 10	1.12179	-0.199219	-1.20168
Unterhaching 9	0.996982	-0.221497	-0.909052
Unterthürheim 201	0.0145046	-0.653429	0.487221
Unterthürheim 39	-0.225456	-0.593779	0.702984
Unterthürheim 51/52	-0.213381	-0.58573	0.668576
Unterthürheim 6/1889	-0.260435	-0.599367	0.75083
Unterthürheim 76	-0.363166	-0.616308	0.925252
Walda Grab A/Grab 7	-2.2533	2.85319	-2.67813
Walheim	1.32894	0.4193	-0.701719
Weihmörting 33	-0.0277296	-0.524316	0.428657
Weilbach 17	-0.311091	-0.566589	0.795063
Weingarten 111	1.19713	-0.234524	-1.35162
Weingarten 113	1.20513	-0.0586258	-1.13179
Weingarten 141	-1.13636	0.568014	0.0199554
Weingarten 153	-1.82431	1.80217	-1.21022
Weingarten 161	-1.53255	1.23553	-0.575667
Weingarten 178	-1.34572	0.810274	-0.0288343
Weingarten 215	0.563683	-0.417238	-0.410703
Weingarten 242	1.25125	-0.00632036	-1.09089
Weingarten 317	-1.66892	1.35276	-0.490833
Weingarten 413	-1.51028	1.09994	-0.298547
Weingarten 414	1.11807	-0.06011	-0.94262
Weingarten 481	-1.57199	1.19868	-0.377012
Weingarten 507	0.0626431	-0.544383	0.335158
Weingarten 567	-0.262147	-0.582742	0.736869
Weingarten 615	-0.633836	-0.113621	0.480146
Weingarten 66	-2.1583	2.59529	-2.29299
Weingarten 668	-0.154912	-0.641785	0.68699
Weingarten 676	0.376372	-0.527787	-0.102598
Weingarten 711	0.953136	-0.320869	-0.950742
Weingarten 775	0.833675	-0.39906	-0.782886
Wenigumstadt 31	-0.327189	-0.580008	0.816836
Westheim 60	0.466517	-0.521062	-0.236336
Wiesbaden-Schwalbacher Str.	3.95478	8.08778	7.42546
Würzburg 2	-0.1212	-0.639584	0.655589
Neudingen 168	-0.0659861	-0.476034	0.526834
Gelchsheim 1	0.135302	-0.560815	0.236047
Quality of fit in plots - variables
	Mass %	Inertia %	Relative contributions could not be calculated
Anhänger1	0.35014	0.518367
Anhänger2	0.210084	0.473645
Anhänger3	0.35014	0.805363
Anhänger4	0.630252	0.530387
Anhänger5	0.210084	0.486941
Armbrustfibel	0.140056	0.535155
Armreif1	1.68067	0.434455
Armreif2	0.140056	0.794436
Beinring(Zierscheibe)	1.40056	0.382944
Bronzebecken1	0.210084	0.513534
Bronzebecken2	0.420168	0.551719
Bronzehülse	0.280112	0.511858
Bronzering(Zierscheibe)	0.280112	0.551747
Bügelfibel(Rositz)	0.140056	0.566496
Bügelfibel(Vogelkopf)	0.210084	0.686388
Bügelfibel1	0.210084	0.693036
Bügelfibel10.1	0.35014	0.649795
Bügelfibel10.2	0.420168	0.612028
Bügelfibel2	0.840336	0.699796
Bügelfibel3.1	0.140056	0.466773
Bügelfibel3.2	0.210084	0.474594
Bügelfibel4.1	0.840336	0.686586
Bügelfibel4.2	0.490196	0.572362
Bügelfibel4.3	0.280112	0.990531
Bügelfibel5.2	0.420168	0.545071
Bügelfibel6.1	1.61064	0.766177
Bügelfibel6.2	1.68067	0.618346
Bügelfibel6.3	0.560224	0.694629
Bügelfibel7	0.35014	0.522719
Bügelfibel8.1	0.490196	0.643594
Bügelfibel8.2	0.560224	0.364235
Bügelfibel9.1	1.40056	0.555465
Bügelfibel9.2	0.420168	0.402307
Bügelknopffibel	0.140056	0.694712
Drahtringe(Federenden)	0.280112	0.497612
Filigranschmuck	1.19048	0.479963
Fingerring1	0.280112	0.56172
Fingerring2	0.280112	0.666429
Flachsbreche	1.47059	0.447275
Gehänge1	0.35014	0.442577
Gehänge2	1.61064	0.413201
Gehänge3	0.210084	0.368223
Gehänge4	0.280112	0.397888
Geweihrosenring	0.210084	0.373921
Geweihscheibe1	0.420168	0.459119
Geweihscheibe2	0.770308	0.616427
Glasbecher1	0.280112	0.816015
Glasbecher2	0.140056	0.634878
Glasschale1	0.420168	0.528451
Gürtel1.11a	0.280112	0.776838
Gürtel2.9	0.140056	0.634878
Gürtel3.1F	0.560224	0.663049
Gürtel3.3F	0.280112	0.940669
Gürtel4.1F	0.140056	0.566496
Gürtel4.3F	0.210084	0.460348
Gürtel4.4F	0.630252	0.674432
Gürtel4.5F	0.280112	0.486474
Gürtel4.6F	0.210084	0.619906
Gürtel4.7F	1.05042	0.491085
Gürtel4.8F	0.70028	0.643694
Halsring1	0.490196	0.422857
Hefteln2	0.140056	0.535155
Holzkasten1	0.210084	0.408112
Holzkasten2	0.35014	0.298406
Kamm1	0.420168	0.953937
Kamm2.1	0.35014	0.423565
Kamm2.2	0.140056	0.834325
Kamm2.3	0.210084	0.520182
Kamm3	3.29132	0.489238
Kamm4	0.630252	0.455041
Kamm5	0.35014	0.897679
Keramikbecher1	0.210084	0.619906
Keramikbecher2	0.35014	0.562038
Keramikkrug2	0.280112	0.501886
Keramikschale1	0.210084	0.382469
Keramiktopf1	0.280112	0.463421
Keramiktopf2	0.420168	0.442024
Keramiktopf3	0.210084	0.426503
Keramiktopf4	0.210084	0.507836
Knochenröhre	0.140056	0.634878
Knotenring	1.19048	0.508064
Kugel1	0.420168	0.644795
Kugel2	0.630252	0.344237
Nadel1	0.35014	0.54572
Nadel10	0.280112	0.541775
Nadel11	0.210084	0.367273
Nadel2	0.420168	0.768737
Nadel3	0.490196	0.76896
Nadel4	0.140056	0.32906
Nadel5	0.140056	0.445404
Nadel6	0.980392	0.367159
Nadel7	0.490196	0.609403
Nadel8	0.70028	0.63942
Nadel9	0.280112	0.601609
Ohrring1.1	0.630252	0.534618
Ohrring1.2	0.980392	0.676228
Ohrring2	0.35014	0.659102
Ohrring3	0.210084	0.473645
Ohrring4	0.140056	0.51521
Ohrring5	0.280112	0.890807
Ohrring6	0.280112	1.04039
Ohrring7	0.910364	0.966241
Perle(Amethyst)	0.630252	0.406604
Perle(Knochen)	0.210084	0.401464
Perle(Chalcedon)	0.280112	0.513283
Perle(dunkelblau)	0.490196	0.484036
Perle(Glas)	0.770308	0.630673
Perle(Millefiori)	3.78151	0.437222
Perle(Reticella)	2.80112	0.401351
PerlenkombinationA	1.12045	0.619071
PerlenkombinationB	1.89076	0.50539
PerlenkombinationC	1.05042	0.845968
PerlenkombinationD	0.70028	0.739429
PerlenkombinationE	1.40056	0.816266
Perlenstrang	1.12045	0.493294
Rautenfibel	0.280112	0.791084
Riemenzunge1	0.980392	0.485532
Riemenzunge2	0.770308	0.415002
Riemenzunge3	1.05042	0.497601
Riemenzunge4	0.490196	0.649292
Riemenzunge5	0.490196	0.655805
Riemenzunge6	0.280112	0.86089
RZ-Beschlag	1.05042	0.545468
Scheibenfibel(Bronzezellen)	0.280112	0.511858
Scheibenfibel(Eisen-/Cloisonné)	0.140056	0.504331
Scheibenfibel(Filigran1)	0.70028	0.595542
Scheibenfibel(Filigran2)	0.210084	0.606609
Scheibenfibel(Glas)	0.280112	0.990531
Scheibenfibel(Kerbschnitt)	0.630252	0.683297
Scheibenfibel(Pressblech)	0.490196	0.985503
ScheibenfibelA/B	0.420168	0.767787
ScheibenfibelC	0.910364	0.558142
ScheibenfibelD/E	1.7507	0.47385
ScheibenfibelF	0.630252	0.539252
ScheibenfibelH	0.490196	0.42176
Schlüssel	0.70028	0.524691
Schnalle1.2	0.490196	0.390418
Schnalle1.3	0.770308	0.832192
Schnalle1.4	0.420168	0.834269
Schnalle1.5	0.420168	0.900752
Schnalle2.1	1.12045	0.48676
S-Fibel1	0.910364	0.502545
S-Fibel2	0.910364	0.539732
S-Fibel3	0.420168	0.51183
S-Fibel4	0.770308	0.600108
Silberlöffel	0.280112	0.34399
S-Schließe	0.35014	0.503344
Sturzbecher1	0.35014	0.418074
Sturzbecher2	0.630252	0.680764
Sturzbecher3	0.280112	0.502598
TerraNigra	0.210084	0.925724
Tierfibel1	1.12045	0.712799
Tierfibel2	0.140056	0.894159
Tierkopfschnalle	0.35014	0.909076
Vierpassfibel	0.280112	0.791084
Vogelfibel1	0.280112	0.59617
Vogelfibel2	0.280112	0.467695
Vogelfibel3.1	0.630252	0.494614
Vogelfibel3.2	1.40056	0.642605
Vogelfibel3.3	0.560224	0.669698
Vogelfibel3.4	0.140056	0.566496
Vogelfibel4	0.210084	0.75287
Vogelfibel5	0.140056	0.535155
Webschwert	0.630252	0.421483
Wirtel(Bernstein)	0.490196	0.569513
Wirtel(Glas)	1.33053	0.493816
Wirtel(Knochen)	0.560224	0.500168
Wirtel(Kristall)	0.560224	0.416115
Wirtel(Millefiori)	0.490196	0.615915
Zierscheibe1	0.980392	0.447543
Zierscheibe2	1.68067	0.496976
Quality of fit in plots - objects
	Mass*100	Inertia %	Relative contributions could not be calculated
Aldingen 15	0.210084	0.194419
Aldingen 18	0.280112	0.201228
Altenerding 117	0.140056	0.370611
Altenerding 1237	0.210084	0.481827
Altenerding 1276	0.420168	0.13822
Altenerding 1299	0.280112	0.426262
Altenerding 1332	0.210084	0.122734
Altenerding 146	0.280112	0.317001
Altenerding 256	0.210084	0.488475
Altenerding 289	0.210084	0.297308
Altenerding 31	0.280112	0.407124
Altenerding 319	0.35014	0.398555
Altenerding 343	0.210084	0.201968
Altenerding 447	0.35014	0.175966
Altenerding 485	0.210084	0.627999
Altenerding 607	0.490196	0.305529
Altenerding 618	0.280112	0.191318
Altenerding 625	0.280112	0.379899
Altenerding 646	0.210084	0.180489
Altenerding 720	0.140056	0.381296
Altenerding 773	0.280112	0.196304
Altenerding 870	0.35014	0.236841
Altenerding 878	0.140056	0.495265
Altenerding 88	0.210084	0.237474
Altenerding 897	0.210084	0.110091
Altenerding 91	0.210084	0.258653
Altenerding 934	0.35014	0.107006
Aschheim-Bajuwarenring 166	0.280112	0.220713
Aschheim-Bajuwarenring 273	0.140056	0.367049
Barbing-Irlmauth 19	0.70028	0.275461
Barbing-Irlmauth 31	0.210084	0.221012
Barbing-Irlmauth 38	0.420168	0.242418
Bargen 5	0.140056	0.227437
Bargen 11	0.210084	0.184921
Bargen 14	0.210084	0.205816
Bargen 18	0.210084	0.205816
Bargen 30	0.140056	0.141959
Bargen 43	0.490196	0.375493
Basel-Bernerring 16	0.35014	0.584129
Basel-Bernerring 27	0.560224	0.255194
Basel-Bernerring 42	0.490196	0.301363
Basel-Gotterbarmweg 10	0.210084	0.266945
Basel-Gotterbarmweg 12	0.210084	0.275147
Basel-Gotterbarmweg 13	0.210084	0.534428
Basel-Gotterbarmweg 18	0.280112	0.349807
Basel-Gotterbarmweg 20	0.210084	0.44262
Basel-Gotterbarmweg 22	0.210084	0.222624
Basel-Gotterbarmweg 33	0.280112	0.411975
Basel-Gotterbarmweg 6	0.490196	0.612659
Basel-Kleinhüningen 100	0.35014	0.506193
Basel-Kleinhüningen 101	0.490196	0.44852
Basel-Kleinhüningen 115	0.210084	0.408112
Basel-Kleinhüningen 120	0.280112	0.388288
Basel-Kleinhüningen 125	0.280112	0.248256
Basel-Kleinhüningen 126	0.770308	0.329753
Basel-Kleinhüningen 134	0.140056	0.227437
Basel-Kleinhüningen 35	0.35014	0.25451
Basel-Kleinhüningen 75	0.140056	0.295818
Berghausen 88	0.140056	0.387871
Binningen 12	0.35014	0.126296
Binningen 7	0.35014	0.13078
Bischofsheim 8	0.140056	0.217464
Bittenbrunn 51	0.140056	0.248125
Bolheim-Anhausen 2/1911	0.280112	0.209936
Buchheim 4/1932	0.140056	0.328037
Bülach 4	0.280112	0.331818
Burghagel 1	0.140056	0.338557
Deißlingen 16	0.490196	0.196159
Dischingen	0.420168	0.221272
Donaueschingen 53/82a	0.140056	0.288147
Donzdorf 78	0.490196	0.22215
Eichstetten 1	0.140056	0.415487
Eichstetten 131	0.140056	0.315763
Eichstetten 132	0.210084	0.229194
Eichstetten 133	0.280112	0.318548
Eichstetten 175	0.210084	0.119072
Eichstetten 270	0.210084	0.281796
Eichstetten 81	0.140056	0.247381
Eichstetten 85	0.140056	0.185216
Eichstetten 99	0.140056	0.101888
Eltheim 2	0.210084	0.166718
Eltville 144	0.280112	0.449531
Eltville 147	0.35014	0.375525
Eltville 184b	0.35014	0.192631
Eppstein 288	0.560224	0.211993
Eschborn 16	0.560224	0.465621
Eschborn 18	0.35014	0.516165
Eschborn 24	0.280112	0.252565
Eschborn 29	0.280112	0.69136
Eschborn 32	0.140056	0.395542
Eschborn 40	0.35014	0.595944
Eschborn 44	0.140056	0.310777
Esslingen-Sirnau 70	0.210084	0.0638023
Etting-Sandfeld 23	0.140056	0.328037
Fellbach-Schmiden 13	0.35014	0.129573
Fellbach-Schmiden 24	0.280112	0.291351
Fellbach-Schmiden 39	0.280112	0.0789631
Flaach 18	0.210084	0.380569
Flaach 21	0.35014	0.273695
Fridingen/Donau 152	0.210084	0.493589
Fridingen/Donau 26	0.35014	0.277114
Graben-Neudorf	0.280112	0.407148
Großmehring-Straßgwender 87	0.280112	0.497612
Güttingen 38	0.490196	0.215688
Güttingen 49	0.35014	0.3316
Güttingen 7	0.420168	0.236403
Hailfingen 218	0.210084	0.244513
Hailfingen 262	0.140056	0.634878
Hailfingen 338	0.35014	0.217866
Hailfingen 361	0.210084	0.269649
Hailfingen 405	0.210084	0.257577
Hailfingen 417b	0.280112	0.331358
Hailfingen 435	0.210084	0.279516
Heidelberg-Kirchheim, Heuau 47	0.280112	0.348398
Heidelberg-Kirchheim, Heuau 56	0.35014	0.311863
Heidelberg-Neuenheim	0.210084	0.553423
Heidenheim-Großkuchen, Gassenäcker 22	0.420168	0.331615
Heidenheim-Großkuchen, Pfaffensteig 1a	0.560224	0.166959
Heilbronn 2	0.210084	0.147881
Heilbronn-Böckingen, Forchenweg 1	0.35014	0.339227
Heilbronn-Neckargartach	0.280112	0.413243
Hellmitzheim 2	0.210084	0.369372
Hemmingen 11	0.210084	0.268995
Hemmingen 14	0.35014	0.453672
Hemmingen 20	0.280112	0.232472
Hemmingen 35	0.140056	0.121302
Hemmingen 36	0.210084	0.374312
Hemmingen 51	0.140056	0.171164
Hemmingen 52	0.210084	0.190828
Hemmingen 59	0.210084	0.30783
Herbolzheim 17	0.280112	0.288576
Herbrechtingen	0.70028	0.189479
Herrenberg 6	0.210084	0.179244
Herten 17	0.280112	0.331818
Herten 56	0.420168	0.35136
Hockenheim 2	0.210084	0.553423
Horb-Altheim 65	0.280112	0.208667
Hüfingen 268	0.280112	0.41314
Hüfingen 299	0.140056	0.126875
Hüfingen 53	0.35014	0.364316
Hugstetten 2	0.140056	0.495265
Hundsbach 1925	0.210084	0.267549
Inzing 85	0.210084	0.297836
Kelheim 32	0.140056	0.415487
Kelheim 41	0.210084	0.109104
Kelheim 44	0.280112	0.069533
Kirchheim/Neckar 1964	0.560224	0.420389
Kirchheim/Ries 117	0.280112	0.363423
Kirchheim/Ries 131	0.140056	0.387871
Kirchheim/Ries 326	0.70028	0.403
Kirchheim/Ries 34	0.140056	0.466773
Kirchheim/Ries 438	0.280112	0.215796
Kirchheim/Teck 85	0.140056	0.315763
Kleinlangheim 175	0.280112	0.239637
Kleinlangheim 226	0.420168	0.176491
Klengen 3	0.490196	0.123209
Klengen 9	0.280112	0.12631
Klepsau 1	0.280112	0.33301
Klepsau 10	0.140056	0.267326
Klepsau 12	0.490196	0.351162
Klepsau 15	0.35014	0.30585
Klepsau 23	0.210084	0.164251
Klepsau 25	0.35014	0.236752
Klepsau 29	0.280112	0.206582
Klepsau 33	0.560224	0.269509
Klepsau 36	0.70028	0.201919
Klepsau 4	0.770308	0.357457
Klepsau 50	0.560224	0.214039
Klepsau 7	0.420168	0.18155
Kochertürn	0.420168	0.40167
Krautheim 4	0.210084	0.484092
Lauchheim 1007	0.630252	0.113582
Lauchheim 1010	0.280112	0.215474
Lauchheim 200	0.420168	0.348246
Lauchheim 204	0.420168	0.437275
Lauchheim 66	0.490196	0.283787
Lauchheim 787	0.280112	0.282494
Lauchheim 9	0.280112	0.110736
Lauchheim 90	0.70028	0.31228
Lauchheim 974	0.280112	0.190606
Leonberg-Eltingen	0.140056	0.38557
Lörrach, Turmringerstr.	0.210084	0.311554
Mahlberg	0.630252	0.364182
Mainz-Hechtsheim 60	0.420168	0.13377
Mannheim-Vogelstang 312	0.280112	0.130772
Marktoberdorf 106	0.35014	0.0893735
Marktoberdorf 114	0.140056	0.171694
Marktoberdorf 16	0.210084	0.360625
Marktoberdorf 215	0.280112	0.417833
Marktoberdorf 216	0.280112	0.417833
Marktoberdorf 59	0.420168	0.175921
Massenheim	0.280112	0.379724
Mengen 11	0.210084	0.237632
Mengen 12	0.560224	0.41669
Mengen 811	0.280112	0.313836
Merdingen 139	0.210084	0.192203
Merdingen 140	0.35014	0.259537
Merdingen 145	0.210084	0.0880883
Müdesheim 44	0.35014	0.23139
Müdesheim 46	0.35014	0.136155
Munningen	0.280112	0.244401
Nagold 1	0.35014	0.324899
Nagold 2	0.210084	0.310763
Neresheim 148	0.210084	0.168756
Neresheim 49	0.210084	0.593313
Niedermörlen 7/1949	0.210084	0.182072
Niedernberg 1/1961	0.210084	0.220379
Niedernberg 11	0.280112	0.229462
Niedernberg 24	0.280112	0.420357
Niedernberg 40	0.280112	0.31811
Niedernberg 8	0.420168	0.212146
Peigen 97	0.210084	0.124362
Pfakofen 209	0.140056	0.535155
Pflaumheim 1/1960	0.280112	0.218758
Pleidelsheim 1/1967	0.420168	0.376822
Pleidelsheim 108	0.140056	0.355652
Pleidelsheim 110	0.35014	0.244217
Pleidelsheim 114	0.210084	0.603285
Pleidelsheim 115	0.280112	0.181283
Pleidelsheim 126	0.35014	0.346066
Pleidelsheim 128	0.35014	0.329793
Pleidelsheim 139	0.280112	0.235561
Pleidelsheim 140	0.70028	0.253009
Pleidelsheim 141	0.280112	0.411185
Pleidelsheim 149	0.210084	0.0799058
Pleidelsheim 155	0.140056	0.17615
Pleidelsheim 165	0.210084	0.291293
Pleidelsheim 17	0.140056	0.136261
Pleidelsheim 196	0.140056	0.0819434
Pleidelsheim 2	0.210084	0.466392
Pleidelsheim 20	0.210084	0.34068
Pleidelsheim 200	0.210084	0.362159
Pleidelsheim 211	0.140056	0.209391
Pleidelsheim 220	0.140056	0.185216
Pleidelsheim 226	0.140056	0.375597
Pleidelsheim 250	0.210084	0.170546
Pleidelsheim 32	0.210084	0.643175
Pleidelsheim 4	0.210084	0.11402
Pleidelsheim 47	0.210084	0.706724
Pleidelsheim 49	0.140056	0.295818
Pleidelsheim 5	0.280112	0.173136
Pleidelsheim 6	0.210084	0.424733
Pleidelsheim 61	0.210084	0.17967
Pleidelsheim 63	0.280112	0.381109
Pleidelsheim 81	0.35014	0.173047
Pleidelsheim 89	0.560224	0.22033
Pleidelsheim 9	0.490196	0.37289
Pleidelsheim 93	0.140056	0.794436
Pleidelsheim 94	0.140056	0.270888
Renningen 5	0.140056	0.594989
Rheinsheim 126	0.140056	0.14073
Schleitheim-Hebsack 363	0.280112	0.44775
Schleitheim-Hebsack 455	0.490196	0.476913
Schretzheim 126	0.560224	0.171405
Schretzheim 133	0.35014	0.140097
Schretzheim 145	0.210084	0.254253
Schretzheim 146	0.210084	0.224811
Schretzheim 182	0.210084	0.280242
Schretzheim 197	0.140056	0.240416
Schretzheim 206	0.280112	0.18027
Schretzheim 22	0.420168	0.145175
Schretzheim 226b	0.490196	0.236559
Schretzheim 23	0.140056	0.428783
Schretzheim 233	0.35014	0.111377
Schretzheim 247	0.210084	0.1848
Schretzheim 250	0.210084	0.174622
Schretzheim 251	0.210084	0.169303
Schretzheim 258	0.560224	0.143402
Schretzheim 26	0.420168	0.229467
Schretzheim 282	0.140056	0.166178
Schretzheim 300	0.35014	0.160587
Schretzheim 305	0.280112	0.11795
Schretzheim 320	0.280112	0.252124
Schretzheim 33	0.210084	0.244707
Schretzheim 336	0.140056	0.225105
Schretzheim 36	0.210084	0.512057
Schretzheim 393	0.210084	0.122161
Schretzheim 399	0.280112	0.298165
Schretzheim 40	0.210084	0.147477
Schretzheim 426	0.140056	0.155074
Schretzheim 448	0.140056	0.168394
Schretzheim 472	0.140056	0.647018
Schretzheim 502	0.35014	0.164562
Schretzheim 513	0.35014	0.214367
Schretzheim 529	0.210084	0.339471
Schretzheim 53	0.210084	0.587614
Schretzheim 54	0.210084	0.380915
Schretzheim 541	0.140056	0.165271
Schretzheim 583a	0.35014	0.0796457
Schretzheim 586	0.210084	0.187284
Schretzheim 615	0.210084	0.141233
Schretzheim 628	0.140056	0.148534
Schretzheim 70	0.280112	0.21537
Schwenningen a.N.	0.420168	0.327683
Seinsheim 2	0.210084	0.204079
Sindelfingen 1894	0.280112	0.184433
Sindelsdorf 107	0.280112	0.160879
Sontheim/Brenz 141	0.280112	0.266507
Sontheim/Brenz 174	0.630252	0.109297
Sontheim/Brenz 178	0.210084	0.253994
Sontheim/Brenz 62	0.140056	0.32128
Sontheim/Brenz 91	0.210084	0.0910588
Straubing-Bajuwarenstr. 150	0.140056	0.347848
Straubing-Bajuwarenstr. 257	0.420168	0.202361
Straubing-Bajuwarenstr. 266	0.280112	0.345533
Straubing-Bajuwarenstr. 432	0.35014	0.161513
Straubing-Bajuwarenstr. 450	0.420168	0.117522
Straubing-Bajuwarenstr. 465	0.280112	0.144923
Straubing-Bajuwarenstr. 803	0.70028	0.297538
Straubing-Wittelsbacherhöhe 2	0.35014	0.212151
Stuttgart-Münster	0.210084	0.304115
Thalmässing 17	0.210084	0.486337
Thüngersheim 1863	0.140056	0.495265
Tiengen 1/1911	0.140056	0.12347
Tiengen 6	0.210084	0.560072
Unterhaching 10	0.280112	0.259225
Unterhaching 9	0.280112	0.308493
Unterthürheim 201	0.140056	0.355652
Unterthürheim 39	0.490196	0.105195
Unterthürheim 51/52	0.280112	0.0946248
Unterthürheim 6/1889	0.210084	0.159757
Unterthürheim 76	0.280112	0.18309
Walda Grab A/Grab 7	0.140056	0.694712
Walheim	0.35014	0.262364
Weihmörting 33	0.490196	0.250157
Weilbach 17	0.210084	0.158191
Weingarten 111	0.210084	0.345449
Weingarten 113	0.280112	0.498821
Weingarten 141	0.140056	0.281572
Weingarten 153	0.140056	0.19749
Weingarten 161	0.210084	0.158328
Weingarten 178	0.210084	0.34163
Weingarten 215	0.35014	0.155147
Weingarten 242	0.210084	0.129382
Weingarten 317	0.140056	0.404608
Weingarten 413	0.210084	0.361574
Weingarten 414	0.35014	0.543725
Weingarten 481	0.140056	0.247381
Weingarten 507	0.280112	0.0927424
Weingarten 567	0.35014	0.272477
Weingarten 615	0.560224	0.173997
Weingarten 66	0.140056	0.259655
Weingarten 668	0.280112	0.184987
Weingarten 676	0.35014	0.168393
Weingarten 711	0.140056	0.189447
Weingarten 775	0.140056	0.285846
Wenigumstadt 31	0.35014	0.1556
Westheim 60	0.140056	0.168346
Wiesbaden-Schwalbacher Str.	0.140056	0.634878
Würzburg 2	0.280112	0.225897
Neudingen 168	0.560224	0.0997284
Gelchsheim 1	0.35014	0.217147
Relative contributions of variables to principal axes
Relative contributions could not be calculated
Relative contributions of objects to principal axes
Relative contributions could not be calculated
Absolute contributions of variables to principal axes
	1. Principal axis	2. Principal axis	3. Principal axis
Anhänger1	0.170788	0.0144317	0.0976944
Anhänger2	0.0626379	0.00412475	0.0215542
Anhänger3	0.261184	0.0726612	0.224189
Anhänger4	0.0730677	0.144395	0.379358
Anhänger5	0.0136569	0.0392117	0.0882851
Armbrustfibel	0.159251	0.000380121	0.134778
Armreif1	0.576448	0.0950306	0.335976
Armreif2	0.352926	0.00485485	0.331086
Beinring(Zierscheibe)	0.440072	5.42508e-06	0.141697
Bronzebecken1	0.519195	0.136269	0.104257
Bronzebecken2	0.17105	0.0539955	0.137891
Bronzehülse	0.115555	0.0191549	0.0796782
Bronzering(Zierscheibe)	0.397704	0.149189	0.0109732
Bügelfibel(Rositz)	0.000330138	0.0468317	0.0400856
Bügelfibel(Vogelkopf)	0.0435791	0.0433784	0.00741696
Bügelfibel1	1.21629	1.27641	0.117589
Bügelfibel10.1	0.00208476	0.0962366	0.039974
Bügelfibel10.2	0.170534	0.0214444	0.224228
Bügelfibel2	2.73598	0.794668	0.351639
Bügelfibel3.1	0.17411	0.000471282	0.157742
Bügelfibel3.2	0.490048	0.124156	0.111318
Bügelfibel4.1	0.787797	0.0341849	0.644191
Bügelfibel4.2	0.278948	0.0424767	0.228174
Bügelfibel4.3	0.713602	0.0102594	1.05534
Bügelfibel5.2	0.0322906	0.0788664	0.000864169
Bügelfibel6.1	1.58531	0.176639	1.48442
Bügelfibel6.2	0.766392	0.200207	0.485669
Bügelfibel6.3	0.0942725	0.113657	0.0207524
Bügelfibel7	0.063914	0.044211	0.164916
Bügelfibel8.1	0.0345766	0.169439	0.335544
Bügelfibel8.2	0.039157	0.0379071	0.0875304
Bügelfibel9.1	0.0384442	0.280554	0.393576
Bügelfibel9.2	0.082169	0.0261223	0.151261
Bügelknopffibel	0.205945	0.00143729	0.196877
Drahtringe(Federenden)	0.929277	0.623469	0.000211649
Filigranschmuck	0.144993	0.185084	0.557937
Fingerring1	0.657483	0.104638	0.230275
Fingerring2	0.674838	0.0720982	0.243957
Flachsbreche	0.0276523	0.165024	0.150157
Gehänge1	0.25328	0.00355663	0.202935
Gehänge2	0.114125	0.161805	0.383451
Gehänge3	0.00112697	0.0415842	0.0426936
Gehänge4	0.283555	0.0968305	0.00274329
Geweihrosenring	0.0154684	0.0201205	0.00383604
Geweihscheibe1	0.00730644	0.089978	0.11716
Geweihscheibe2	0.0598203	0.194502	0.366294
Glasbecher1	1.8502	1.74829	0.0827928
Glasbecher2	0.121245	0.0128094	0.119329
Glasschale1	0.449494	0.000293778	0.306764
Gürtel1.11a	0.681344	0.397048	0.152996
Gürtel2.9	0.0102194	0.0636492	0.131151
Gürtel3.1F	0.840914	0.00217439	0.756891
Gürtel3.3F	1.877	2.4794	2.27841
Gürtel4.1F	0.191721	0.00124134	0.21581
Gürtel4.3F	0.187271	0.00175733	0.170809
Gürtel4.4F	0.669603	0.0299126	0.588849
Gürtel4.5F	0.240764	0.00379135	0.225515
Gürtel4.6F	0.000753152	0.0605982	0.0577336
Gürtel4.7F	0.0915953	0.205281	0.495081
Gürtel4.8F	0.00175672	0.215768	0.163078
Halsring1	0.847168	0.212471	0.0897022
Hefteln2	0.00601999	0.0489673	0.0879638
Holzkasten1	0.0552491	0.00534442	0.0550797
Holzkasten2	0.0170497	0.048531	0.110112
Kamm1	6.33611	15.9453	10.0847
Kamm2.1	0.31532	0.000395435	0.272022
Kamm2.2	0.560502	0.123054	0.169703
Kamm2.3	0.271162	0.000705675	0.233521
Kamm3	0.325836	0.403813	0.96988
Kamm4	0.0565122	0.0161208	0.0298658
Kamm5	2.30716	3.26464	3.28949
Keramikbecher1	0.319121	0.00239748	0.367808
Keramikbecher2	0.429947	0.000281316	0.370652
Keramikkrug2	1.12905e-05	0.0720554	0.0482264
Keramikschale1	0.323158	0.0305273	0.178606
Keramiktopf1	0.00746797	0.0623216	0.0991105
Keramiktopf2	0.0364746	0.0752517	0.190949
Keramiktopf3	0.0148651	0.0454308	0.104075
Keramiktopf4	0.37783	0.263428	0.125476
Knochenröhre	0.302426	0.0110594	0.242454
Knotenring	0.782733	0.021897	0.706707
Kugel1	0.197965	0.0369642	0.131863
Kugel2	0.0787571	0.024745	0.116763
Nadel1	0.704977	0.0846728	0.257949
Nadel10	0.666241	0.442265	0.11068
Nadel11	0.297387	0.191338	0.0590345
Nadel2	0.80919	0.02427	0.402469
Nadel3	0.394974	0.101167	0.408326
Nadel4	0.107312	5.56589e-05	0.0911886
Nadel5	0.0530334	0.0129733	0.0459591
Nadel6	0.103934	0.0914419	0.306061
Nadel7	0.0253753	0.0298898	0.0140796
Nadel8	0.861691	0.170596	0.00355398
Nadel9	0.4268	0.125429	1.74815e-07
Ohrring1.1	0.688383	0.0143686	0.766614
Ohrring1.2	2.58134	1.79062	0.713466
Ohrring2	0.256932	0.0334252	0.211245
Ohrring3	0.135291	0.0095186	0.109397
Ohrring4	0.212652	0.0840971	0.00449696
Ohrring5	1.08062	0.648867	0.101641
Ohrring6	2.5843	4.15271	4.65616
Ohrring7	5.22737	5.65631	4.04845
Perle(Amethyst)	0.0835534	0.04182	0.16785
Perle(Knochen)	0.00138747	0.0345293	0.0331957
Perle(Chalcedon)	0.329944	0.000362402	0.324058
Perle(dunkelblau)	0.463306	0.0129052	0.156676
Perle(Glas)	0.983989	0.00912831	0.96857
Perle(Millefiori)	0.284227	0.532457	1.18596
Perle(Reticella)	0.067789	0.496013	0.745487
PerlenkombinationA	1.8111	0.0302019	1.09478
PerlenkombinationB	0.0110394	0.407592	0.128099
PerlenkombinationC	0.587691	0.0393877	0.458088
PerlenkombinationD	1.21646	0.396941	0.0196167
PerlenkombinationE	4.27844	3.16163	1.59722
Perlenstrang	1.69606	0.177891	0.40978
Rautenfibel	0.0159057	0.108161	0.00228408
Riemenzunge1	0.250841	0.118361	0.147806
Riemenzunge2	0.0379001	0.129988	0.260004
Riemenzunge3	1.12494	0.38036	0.0353031
Riemenzunge4	0.995471	0.418404	0.0231207
Riemenzunge5	1.00902	0.426497	0.0248746
Riemenzunge6	1.23339	1.02559	0.433462
RZ-Beschlag	1.93401	0.983751	0.149868
Scheibenfibel(Bronzezellen)	0.0467232	0.0375998	0.126656
Scheibenfibel(Eisen-/Cloisonné)	0.0370173	0.0126049	0.0749253
Scheibenfibel(Filigran1)	0.381308	0.000496246	0.121259
Scheibenfibel(Filigran2)	0.614052	0.554583	0.331669
Scheibenfibel(Glas)	0.134521	0.0633338	0.327741
Scheibenfibel(Kerbschnitt)	0.153889	0.136595	0.0535296
Scheibenfibel(Pressblech)	3.0608	3.77483	3.4135
ScheibenfibelA/B	0.00988872	0.182555	0.217607
ScheibenfibelC	0.0104633	0.233158	0.244031
ScheibenfibelD/E	0.11015	0.367417	0.754227
ScheibenfibelF	0.111676	0.107835	0.382926
ScheibenfibelH	0.0433341	0.0628058	0.179153
Schlüssel	0.0214002	0.104836	0.126359
Schnalle1.2	0.0695832	0.0135592	0.0654725
Schnalle1.3	1.96403	0.871638	0.0974065
Schnalle1.4	1.46704	1.14878	0.55425
Schnalle1.5	1.5124	0.960557	0.253792
Schnalle2.1	0.116826	0.170025	0.443755
S-Fibel1	0.0733297	0.103329	0.00202005
S-Fibel2	0.0489824	0.231052	0.42478
S-Fibel3	0.0260815	0.0820598	0.156506
S-Fibel4	0.0757866	0.243144	0.548981
Silberlöffel	0.147852	0.00511652	0.115314
S-Schließe	0.718254	0.0796475	0.351324
Sturzbecher1	0.0198439	0.077862	0.160558
Sturzbecher2	0.081141	0.182556	0.453527
Sturzbecher3	0.0324985	0.0706973	0.196188
TerraNigra	4.52905	16.3977	15.2129
Tierfibel1	1.61869	0.0345893	1.7271
Tierfibel2	0.152373	0.0356581	0.17374
Tierkopfschnalle	5.75857	17.563	14.3529
Vierpassfibel	0.013766	0.126655	0.187867
Vogelfibel1	0.344397	0.00671975	0.374186
Vogelfibel2	0.0271442	0.0328027	0.000178462
Vogelfibel3.1	0.528901	0.0104513	0.443103
Vogelfibel3.2	0.783507	0.139413	0.597847
Vogelfibel3.3	0.412242	0.0318677	0.40816
Vogelfibel3.4	0.0308529	0.0302906	0.00993536
Vogelfibel4	0.00034701	0.0770992	0.0241982
Vogelfibel5	0.00572546	0.0303926	9.41203e-07
Webschwert	0.0304768	0.0962614	0.178389
Wirtel(Bernstein)	0.204306	0.0330979	0.106475
Wirtel(Glas)	0.000523202	0.286869	0.154679
Wirtel(Knochen)	0.0395852	0.0805422	0.13328
Wirtel(Kristall)	0.0377747	0.0642484	0.00368649
Wirtel(Millefiori)	0.0184732	0.120114	0.196711
Zierscheibe1	0.163137	0.0797873	0.325145
Zierscheibe2	1.35606	0.198221	0.0271291
Absolute contributions of objects to principal axes
	1. Principal axis	2. Principal axis	3. Principal axis
Aldingen 15	0.102208	0.00278804	0.0636626
Aldingen 18	0.297068	0.0245904	0.100165
Altenerding 117	0.241535	0.00463082	0.346858
Altenerding 1237	0.0331144	0.0574516	2.38706e-05
Altenerding 1276	0.0218676	0.0292697	0.0706616
Altenerding 1299	0.419145	0.00542923	0.371879
Altenerding 1332	5.53692e-05	0.0146576	0.0055858
Altenerding 146	0.173373	0.020073	0.13218
Altenerding 256	0.0415091	0.0762006	0.00308684
Altenerding 289	0.137731	0.0206806	0.126126
Altenerding 31	0.187504	0.0530756	0.154976
Altenerding 319	0.0973859	0.0927973	0.039608
Altenerding 343	0.0044583	0.0153632	0.000974591
Altenerding 447	0.000460263	0.0327567	0.0183686
Altenerding 485	0.506329	0.0161644	0.602787
Altenerding 607	0.146734	0.0766705	0.0719081
Altenerding 618	0.0458911	0.0210389	0.0259223
Altenerding 625	0.136268	0.0401815	0.0992597
Altenerding 646	0.0726594	0.0125485	0.0625352
Altenerding 720	0.486249	0.407327	0.172531
Altenerding 773	0.0214982	0.0233351	0.0565782
Altenerding 870	0.00538709	0.0827343	0.105417
Altenerding 878	0.63931	0.514808	0.184818
Altenerding 88	0.0641064	0.020857	0.0403447
Altenerding 897	0.0172878	0.0127346	0.00602688
Altenerding 91	0.0560841	0.0261863	0.030043
Altenerding 934	0.000790459	0.0279894	0.0258037
Aschheim-Bajuwarenring 166	0.0417089	0.0314505	0.123638
Aschheim-Bajuwarenring 273	0.370488	0.214327	0.0347982
Barbing-Irlmauth 19	0.387686	0.0318027	0.231245
Barbing-Irlmauth 31	0.108997	0.00804561	0.0881011
Barbing-Irlmauth 38	0.0128388	0.0439191	0.000865876
Bargen 5	0.320505	0.351657	0.26833
Bargen 11	0.216802	0.109052	0.0219584
Bargen 14	0.402763	0.397393	0.261161
Bargen 18	0.402763	0.397393	0.261161
Bargen 30	0.154153	0.12073	0.0559457
Bargen 43	1.05823	0.718711	0.34364
Basel-Bernerring 16	0.035028	0.225069	0.403088
Basel-Bernerring 27	0.0578792	0.112907	0.292744
Basel-Bernerring 42	0.0150659	0.0890071	0.0114413
Basel-Gotterbarmweg 10	0.337332	0.0233701	0.155162
Basel-Gotterbarmweg 12	0.0682629	0.0306643	0.0465032
Basel-Gotterbarmweg 13	0.961185	0.216353	0.235813
Basel-Gotterbarmweg 18	0.872081	0.235265	0.161998
Basel-Gotterbarmweg 20	0.54091	0.0239568	0.286171
Basel-Gotterbarmweg 22	0.170642	0.00398415	0.187743
Basel-Gotterbarmweg 33	0.384848	0.006493	0.389329
Basel-Gotterbarmweg 6	1.77137	0.0618877	1.16299
Basel-Kleinhüningen 100	1.23855	0.107787	0.661365
Basel-Kleinhüningen 101	0.963865	0.000207995	0.795281
Basel-Kleinhüningen 115	0.0615585	0.0653664	0.0297876
Basel-Kleinhüningen 120	0.338917	0.0190627	0.337278
Basel-Kleinhüningen 125	0.00578484	0.0696396	0.0855185
Basel-Kleinhüningen 126	1.00219	0.000913109	0.652664
Basel-Kleinhüningen 134	0.0619198	0.0147123	0.0626423
Basel-Kleinhüningen 35	0.0975006	0.0429421	0.0580607
Basel-Kleinhüningen 75	0.159234	2.13876e-05	0.111711
Berghausen 88	0.488225	0.455776	0.276286
Binningen 12	0.0151465	0.0352567	0.0814545
Binningen 7	0.0460584	0.00685885	0.0517063
Bischofsheim 8	0.0454416	0.0103828	0.0294434
Bittenbrunn 51	0.0697491	0.010798	0.0638938
Bolheim-Anhausen 2/1911	0.084015	0.0264718	0.0629492
Buchheim 4/1932	0.61798	0.846193	0.759708
Bülach 4	0.0307186	0.0632301	0.150305
Burghagel 1	0.00805443	0.0489638	0.0915395
Deißlingen 16	0.0630917	0.0334067	0.0130588
Dischingen	0.0167998	0.0527345	0.0844221
Donaueschingen 53/82a	0.411896	0.42339	0.26693
Donzdorf 78	0.0695725	0.0505186	0.190716
Eichstetten 1	0.385839	0.200107	0.0230676
Eichstetten 131	0.287537	0.177203	0.0532745
Eichstetten 132	0.447562	0.429197	0.256961
Eichstetten 133	0.844092	0.764323	0.383651
Eichstetten 175	0.00900911	0.00868609	0.0194979
Eichstetten 270	0.243774	0.145652	0.0742328
Eichstetten 81	0.19511	0.128572	0.0745047
Eichstetten 85	0.086559	0.0131581	0.00159434
Eichstetten 99	0.0115587	0.00400914	0.018193
Eltheim 2	0.121019	2.61346e-05	0.0665871
Eltville 144	0.269754	0.0253699	0.192833
Eltville 147	0.469807	0.00559989	0.441851
Eltville 184b	0.0572033	0.0127245	0.0695391
Eppstein 288	0.220103	0.00914264	0.0151808
Eschborn 16	2.13006	0.644558	0.215012
Eschborn 18	1.65017	0.492342	0.259348
Eschborn 24	0.00182081	0.0560499	0.037767
Eschborn 29	2.44501	1.58046	0.0132849
Eschborn 32	0.70375	0.474838	0.000934918
Eschborn 40	1.33317	0.0735053	0.821636
Eschborn 44	0.796939	1.54594	0.851518
Esslingen-Sirnau 70	0.00339709	0.0110857	0.0220196
Etting-Sandfeld 23	0.61798	0.846193	0.759708
Fellbach-Schmiden 13	0.00186358	0.0374636	0.0374665
Fellbach-Schmiden 24	0.267982	0.00942735	0.288619
Fellbach-Schmiden 39	0.00215718	0.0174981	0.0220861
Flaach 18	0.392687	0.00301229	0.299373
Flaach 21	0.11675	0.0510119	0.0846216
Fridingen/Donau 152	0.40627	0.00731138	0.531654
Fridingen/Donau 26	0.688384	0.434241	0.110412
Graben-Neudorf	0.2414	0.0196305	0.191235
Großmehring-Straßgwender 87	2.09178	3.20099	3.27694
Güttingen 38	0.00806632	0.0276549	0.0303715
Güttingen 49	0.896826	0.674355	0.270521
Güttingen 7	0.362015	0.0670521	0.00582013
Hailfingen 218	0.0216357	0.0210796	0.0529212
Hailfingen 262	0.0459847	0.0718238	0.0127125
Hailfingen 338	0.0152526	0.0686555	0.122595
Hailfingen 361	9.91645e-06	0.0444938	0.0178318
Hailfingen 405	0.00943973	0.0454544	0.0732852
Hailfingen 417b	0.0208482	0.0961317	0.193611
Hailfingen 435	0.0212456	0.0582629	0.144514
Heidelberg-Kirchheim, Heuau 47	0.0228226	0.0653083	0.0003727
Heidelberg-Kirchheim, Heuau 56	0.00175461	0.0757521	0.0498266
Heidelberg-Neuenheim	4.47152	15.0795	12.4892
Heidenheim-Großkuchen, Gassenäcker 22	0.427809	0.00114047	0.265322
Heidenheim-Großkuchen, Pfaffensteig 1a	0.0272139	0.0546256	0.114538
Heilbronn 2	0.0421726	4.75438e-05	0.0161405
Heilbronn-Böckingen, Forchenweg 1	0.741363	0.0864169	0.221752
Heilbronn-Neckargartach	0.025311	0.106127	0.194671
Hellmitzheim 2	0.0219924	0.0482101	0.000176072
Hemmingen 11	0.200762	0.000317088	0.133859
Hemmingen 14	0.445004	0.0164915	0.367313
Hemmingen 20	0.139025	0.0121606	0.131903
Hemmingen 35	0.0528222	0.000501193	0.03651
Hemmingen 36	0.144725	0.0187374	0.111563
Hemmingen 51	0.156048	0.0121234	0.0689317
Hemmingen 52	0.131439	0.00603834	0.138218
Hemmingen 59	0.204363	0.00643105	0.216807
Herbolzheim 17	0.0379456	0.0605279	0.167491
Herbrechtingen	0.0639884	0.0786186	0.233331
Herrenberg 6	0.140183	0.00409116	0.152512
Herten 17	0.364182	0.00709044	0.437246
Herten 56	0.611796	0.00059802	0.529689
Hockenheim 2	4.47152	15.0795	12.4892
Horb-Altheim 65	0.186225	0.0139629	0.218436
Hüfingen 268	0.0601844	0.0730628	0.23785
Hüfingen 299	0.00475585	0.0135009	0.0293116
Hüfingen 53	0.0486909	0.0894918	0.234694
Hugstetten 2	0.322597	0.00202043	0.386995
Hundsbach 1925	0.104933	2.25375e-06	0.0452537
Inzing 85	6.16524e-05	0.0549818	0.0318133
Kelheim 32	0.0259748	0.0330902	0.0930541
Kelheim 41	0.00452547	0.0174079	0.0295749
Kelheim 44	0.00508295	0.0135039	0.025945
Kirchheim/Neckar 1964	0.507481	0.0388642	0.381859
Kirchheim/Ries 117	0.709759	0.461309	0.13843
Kirchheim/Ries 131	0.719301	0.947311	0.802643
Kirchheim/Ries 326	1.31629	0.506948	0.0431224
Kirchheim/Ries 34	1.00224	1.56735	1.65398
Kirchheim/Ries 438	0.412521	0.233271	0.0424322
Kirchheim/Teck 85	0.0703887	0.00158661	0.054799
Kleinlangheim 175	0.0459309	0.0345612	0.132972
Kleinlangheim 226	0.0174355	0.0456834	0.0750154
Klengen 3	0.0156926	0.0411727	0.0807903
Klengen 9	0.0104114	0.0256534	0.0532199
Klepsau 1	0.0156188	0.0827073	0.121283
Klepsau 10	0.0161301	0.0158941	0.00132961
Klepsau 12	0.108406	0.0880772	0.308868
Klepsau 15	0.0174599	0.101489	0.1627
Klepsau 23	0.00654997	0.0313286	0.0533259
Klepsau 25	0.0319116	0.0524196	0.123403
Klepsau 29	0.0618718	0.00424835	0.0438203
Klepsau 33	0.0343346	0.0916354	0.168022
Klepsau 36	0.034889	0.10541	0.208239
Klepsau 4	0.128444	0.20372	0.577803
Klepsau 50	0.0360156	0.021947	0.0520045
Klepsau 7	0.00730542	0.0386595	0.0493471
Kochertürn	0.451967	0.0062826	0.282971
Krautheim 4	0.147528	0.0048409	0.117359
Lauchheim 1007	0.00262512	0.0457791	0.0478938
Lauchheim 1010	0.161319	0.0106061	0.165253
Lauchheim 200	0.57997	0.201555	0.0229894
Lauchheim 204	1.37818	0.954478	0.309406
Lauchheim 66	0.303719	0.00876967	0.0564447
Lauchheim 787	0.00030015	0.0529676	0.0271886
Lauchheim 9	0.0995478	0.0199082	0.000151132
Lauchheim 90	0.632462	0.0909278	0.0150484
Lauchheim 974	0.0772725	0.0244006	0.0609137
Leonberg-Eltingen	0.166868	0.0102437	0.165844
Lörrach, Turmringerstr.	0.175806	0.0200547	0.197823
Mahlberg	0.866231	0.000144006	0.552169
Mainz-Hechtsheim 60	0.090354	0.00334216	0.00367816
Mannheim-Vogelstang 312	0.146869	0.0453815	0.00190411
Marktoberdorf 106	0.00906702	0.024636	0.0521208
Marktoberdorf 114	0.00437181	0.00838442	0.000977758
Marktoberdorf 16	0.406691	0.175452	0.0157659
Marktoberdorf 215	0.900414	0.543328	0.0870536
Marktoberdorf 216	0.89969	0.542337	0.0863954
Marktoberdorf 59	0.0757822	0.0131344	0.0955301
Massenheim	0.226174	0.0316687	0.206837
Mengen 11	0.127735	0.0111182	0.122198
Mengen 12	0.208775	0.0892774	0.116863
Mengen 811	0.256032	0.0456337	0.000251852
Merdingen 139	0.0150762	0.0354023	0.0886607
Merdingen 140	0.014317	0.0858781	0.144053
Merdingen 145	0.00581647	0.0140525	0.0306143
Müdesheim 44	0.00540918	0.0610836	0.076567
Müdesheim 46	0.0196487	0.0206092	0.0506919
Munningen	0.0386013	0.036654	0.126922
Nagold 1	0.542661	0.00152385	0.395739
Nagold 2	0.49731	0.0890901	0.127855
Neresheim 148	0.0607908	0.0088607	0.0473249
Neresheim 49	0.528282	0.000782843	0.556848
Niedermörlen 7/1949	0.0194295	0.0124664	0.0159408
Niedernberg 1/1961	0.0388515	0.0143787	0.0728305
Niedernberg 11	0.0156707	0.0618065	0.124872
Niedernberg 24	0.0124407	0.121117	0.18398
Niedernberg 40	0.0863503	0.0239204	0.138753
Niedernberg 8	0.0361708	0.0415678	0.102988
Peigen 97	0.00609116	0.0195007	0.0378586
Pfakofen 209	1.23085	2.03839	2.23927
Pflaumheim 1/1960	0.0971702	2.06451e-08	0.0344472
Pleidelsheim 1/1967	0.55821	0.00116465	0.416495
Pleidelsheim 108	0.53597	0.619096	0.483577
Pleidelsheim 110	0.00878983	0.0715439	0.00810304
Pleidelsheim 114	0.466971	0.0011923	0.374577
Pleidelsheim 115	0.14139	0.00412371	0.119145
Pleidelsheim 126	0.000127197	0.0691254	0.0183341
Pleidelsheim 128	0.0225904	0.0953658	0.1704
Pleidelsheim 139	0.00587184	0.0707775	0.100075
Pleidelsheim 140	0.0275785	0.147548	0.229346
Pleidelsheim 141	0.0015177	0.0755684	0.0338123
Pleidelsheim 149	0.010662	0.00677526	0.0233527
Pleidelsheim 155	0.138214	0.0712507	0.0168364
Pleidelsheim 165	0.597303	0.613732	0.41366
Pleidelsheim 17	0.0103903	0.00697124	0.0222656
Pleidelsheim 196	0.0331278	0.00861077	0.00108054
Pleidelsheim 2	0.419559	0.0059668	0.537402
Pleidelsheim 20	0.0551159	0.0316479	0.130602
Pleidelsheim 200	0.671551	0.625324	0.375977
Pleidelsheim 211	0.023195	0.0121233	0.0510668
Pleidelsheim 220	0.0179731	0.0104209	0.0377518
Pleidelsheim 226	0.178162	0.037994	0.000437373
Pleidelsheim 250	0.0215073	0.0175526	0.0567655
Pleidelsheim 32	0.90267	0.0506862	0.602424
Pleidelsheim 4	0.00262811	0.0190273	0.0248253
Pleidelsheim 47	0.695751	0.00215267	0.662837
Pleidelsheim 49	0.791202	1.28436	0.425716
Pleidelsheim 5	0.00422391	0.0365614	0.0402866
Pleidelsheim 6	0.291769	0.00124817	0.14546
Pleidelsheim 61	0.0387	0.0187099	0.022006
Pleidelsheim 63	0.00977034	0.112848	0.158642
Pleidelsheim 81	0.12605	0.00966685	0.0809464
Pleidelsheim 89	0.000277458	0.0954419	0.0579324
Pleidelsheim 9	0.000140193	0.167004	0.112893
Pleidelsheim 93	0.804167	0.10447	0.342444
Pleidelsheim 94	0.117585	0.000545676	0.0827175
Renningen 5	1.99469	3.97696	1.66417
Rheinsheim 126	0.00980671	0.0122046	0.00183371
Schleitheim-Hebsack 363	2.62175	4.95357	2.21019
Schleitheim-Hebsack 455	1.94798	0.402802	0.544293
Schretzheim 126	0.0773268	0.0189427	0.102108
Schretzheim 133	0.121183	0.00873914	0.00923514
Schretzheim 145	0.000427977	0.0411453	0.012421
Schretzheim 146	0.00115041	0.0399655	0.0114083
Schretzheim 182	0.0266837	0.0496008	0.136182
Schretzheim 197	7.81119e-05	0.0369365	0.0271203
Schretzheim 206	0.0143041	0.0445548	0.0972682
Schretzheim 22	0.0358485	0.0279998	0.0945792
Schretzheim 226b	0.457501	0.137658	0.00328824
Schretzheim 23	0.0491416	0.0361404	0.158294
Schretzheim 233	0.0639165	6.14156e-05	0.0188495
Schretzheim 247	0.00628819	0.0329234	0.0525294
Schretzheim 250	0.0105192	0.0310137	0.065571
Schretzheim 251	0.0892452	0.00751965	0.00496046
Schretzheim 258	0.0360144	0.0473885	0.126555
Schretzheim 26	0.0399156	0.068191	0.177647
Schretzheim 282	0.0837	0.0157701	0.000963035
Schretzheim 300	0.0143284	0.049266	0.101174
Schretzheim 305	0.130652	0.041469	0.00263926
Schretzheim 320	0.273324	0.0622427	0.000926231
Schretzheim 33	0.00149509	0.0194311	0.000222723
Schretzheim 336	0.172538	0.072996	0.00615492
Schretzheim 36	0.00212308	0.108714	0.0982166
Schretzheim 393	0.0973286	0.0324058	0.00342504
Schretzheim 399	0.480768	0.229634	0.0317986
Schretzheim 40	0.00197689	0.0248247	0.0266663
Schretzheim 426	0.000241369	0.013657	0.00222616
Schretzheim 448	7.20635e-05	0.0160801	0.00511298
Schretzheim 472	0.230132	0.0418857	0.267718
Schretzheim 502	0.00539073	0.0417543	0.0500461
Schretzheim 513	0.0243117	0.0543994	0.128584
Schretzheim 529	0.0341228	0.0597891	0.168948
Schretzheim 53	0.662189	0.247315	0.00603995
Schretzheim 54	0.472168	0.199864	0.00910037
Schretzheim 541	0.159581	0.102902	0.0326712
Schretzheim 583a	0.010674	0.0134317	0.0318587
Schretzheim 586	0.00758665	0.0354668	0.0624446
Schretzheim 615	0.183756	0.107241	0.028746
Schretzheim 628	0.20192	0.203703	0.131563
Schretzheim 70	0.000954727	0.0553475	0.0476887
Schwenningen a.N.	0.00111356	0.0750667	0.0535296
Seinsheim 2	0.00827732	0.0396714	0.0711062
Sindelfingen 1894	0.117047	0.0120883	0.112941
Sindelsdorf 107	0.0181873	0.0233078	0.0598415
Sontheim/Brenz 141	0.0287152	0.0567965	0.138771
Sontheim/Brenz 174	0.0105847	0.0343829	0.0527497
Sontheim/Brenz 178	0.0140517	0.0578472	0.123776
Sontheim/Brenz 62	0.0111652	0.0394719	0.0740006
Sontheim/Brenz 91	0.00411129	0.0173603	0.0326018
Straubing-Bajuwarenstr. 150	0.0485746	0.0313967	0.0275498
Straubing-Bajuwarenstr. 257	0.0203011	0.0676438	0.130273
Straubing-Bajuwarenstr. 266	0.272778	0.010497	0.223478
Straubing-Bajuwarenstr. 432	0.00427003	0.0308147	0.00389073
Straubing-Bajuwarenstr. 450	0.0119993	0.0405931	0.0815842
Straubing-Bajuwarenstr. 465	0.0183038	0.0240427	0.0683662
Straubing-Bajuwarenstr. 803	0.0243577	0.103526	0.154796
Straubing-Wittelsbacherhöhe 2	0.0813513	0.0243634	0.0554782
Stuttgart-Münster	0.147105	0.0127861	0.131316
Thalmässing 17	0.0225725	0.126031	0.252238
Thüngersheim 1863	1.63857	3.17237	1.24967
Tiengen 1/1911	0.0574089	0.00330673	0.0650849
Tiengen 6	0.221062	0.0491969	0.203924
Unterhaching 10	0.244517	0.00675386	0.262846
Unterhaching 9	0.22984	0.00993564	0.179006
Unterthürheim 201	2.80422e-05	0.0498432	0.0296409
Unterthürheim 39	0.00701398	0.0426085	0.0638806
Unterthürheim 51/52	0.00322939	0.0213114	0.0296996
Unterthürheim 6/1889	0.00609149	0.0282566	0.0474295
Unterthürheim 76	0.0181001	0.0456534	0.11006
Walda Grab A/Grab 7	1.32196	1.8563	1.74938
Walheim	0.434139	0.0378509	0.113392
Weihmörting 33	0.000252314	0.0790041	0.0564826
Weilbach 17	0.00860643	0.025003	0.052661
Weingarten 111	0.278314	0.00935476	0.332354
Weingarten 113	0.543018	0.00112547	0.448661
Weingarten 141	0.13627	0.0298188	3.93663e-05
Weingarten 153	0.24633	0.210532	0.101551
Weingarten 161	0.209053	0.118998	0.0276316
Weingarten 178	0.347803	0.110432	0.000149582
Weingarten 215	0.046188	0.0221633	0.0229696
Weingarten 242	0.113875	2.54466e-06	0.0810846
Weingarten 317	0.422358	0.243029	0.0342228
Weingarten 413	0.463636	0.21538	0.0169718
Weingarten 414	0.636844	0.00161211	0.42404
Weingarten 481	0.22911	0.116669	0.012345
Weingarten 507	0.000272791	0.0180426	0.00731513
Weingarten 567	0.0175443	0.0759287	0.129857
Weingarten 615	0.104792	0.00294916	0.0563328
Weingarten 66	0.453311	0.57405	0.479309
Weingarten 668	0.00332747	0.0500187	0.0613035
Weingarten 676	0.0223498	0.0384915	0.00155579
Weingarten 711	0.0645018	0.00640215	0.060121
Weingarten 775	0.0744562	0.0149414	0.0615096
Wenigumstadt 31	0.0156071	0.0429538	0.0911242
Westheim 60	0.0137313	0.0150025	0.00330124
Wiesbaden-Schwalbacher Str.	3.72143	13.6311	12.29
Würzburg 2	0.00248723	0.0606622	0.0681737
Neudingen 168	0.000650966	0.0296713	0.0388723
Gelchsheim 1	0.00372455	0.0560422	0.0106195
